# Supplementary material for: Post-synthetic modulation of the charge distribution in a metal–organic framework for optimal binding of carbon dioxide and sulfur dioxide
Source: PubMed Central journal article supplement (PMC6369579; doi:10.1039/c8sc01959b), 2018-10-31
Supplement: SC-010-C8SC01959B-s001.pdf [file SC-010-C8SC01959B-s001.pdf]

## Supplementary Information

# Post-synthetic Modulation of the Charge Distribution in a Metal-Organic Framework for Optimal Binding of Carbon Dioxide and Sulfur Dioxide

Lei Li,<sup>1,2</sup> Ivan da Silva,<sup>3</sup> Daniil I. Kolokolov,<sup>4,5</sup> Xue Han,<sup>1</sup> Jiangnan Li,<sup>1</sup> Gemma Smith,<sup>1</sup> Yongqiang Cheng,<sup>6</sup> Luke L. Daemen,<sup>6</sup> Christopher G. Morris,<sup>1,7</sup> Harry G.W. Godfrey,<sup>1</sup> Nicholas M. Jacques,<sup>1</sup> Xinran Zhang,<sup>1</sup> Pascal Manuel,<sup>3</sup> Mark D. Frogley,<sup>7</sup> Claire A. Murray,<sup>7</sup> Anibal J. Ramirez-Cuesta,<sup>6</sup> Gianfelice Cinque,<sup>7</sup> Chiu C. Tang,<sup>7</sup> Alexander G. Stepanov,<sup>4,5</sup> Sihai Yang<sup>1\*</sup> and Martin Schröder<sup>1\*</sup>

[1] School of Chemistry, University of Manchester, Oxford Road, Manchester, M13 9PL (UK)  
Sihai.Yang@manchester.ac.uk, M.Schroder@manchester.ac.uk

[2] Lehn Institute of Functional Materials, School of Chemistry, Sun Yat-Sen University, Guangzhou, 510275 (China)

[3] ISIS Neutron Facility, STFC Rutherford Appleton Laboratory, Chilton, Oxfordshire, OX11 0QX (UK)

[4] Boreskov Institute of Catalysis, Siberian Branch of Russian Academy of Sciences, Prospekt Akademika Lavrentieva 5, Novosibirsk, 630090 (Russia)

[5] Novosibirsk State University, Novosibirsk 630090 (Russia)

[6] The Chemical and Engineering Materials Division (CEMD), Neutron Sciences Directorate, Oak Ridge National Laboratory, Oak Ridge, TN 37831 (USA)

[7] Diamond Light Source, Harwell Science Campus, Oxfordshire, OX11 0DE (UK)

## EXPERIMENTAL SECTION

### Materials and measurements

All reagents were commercially available and used as received. Powder X-ray diffraction (PXRD) patterns were recorded on a Phillips PANalytical diffractometer for Cu-K $\alpha$  radiation ( $\lambda = 1.5406 \text{ \AA}$ ) at a scan rate of  $2^\circ \text{ min}^{-1}$  and a step size of  $0.02^\circ$  in  $2\theta$ . Variable-temperature PXRD were carried out under vacuum on a Phillips PANalytical diffractometer. The diffractograms were recorded in the low angle  $2\theta$  range, heating *in situ* by increments of  $50^\circ\text{C}$  until significant loss of crystallinity was observed. Fourier transform infrared (FT-IR) spectra were measured on a Nicolet Avatar 360 FT-IR spectrophotometer in the  $400\text{-}4000 \text{ cm}^{-1}$  region. Thermal gravimetric analyses (TGA) were performed under  $\text{N}_2$  (100 ml/min) with a heating rate of  $2^\circ\text{C}/\text{min}$  using a TA SDT-600 thermogravimetric analyzer in the range of  $25\text{-}800 \text{ }^\circ\text{C}$ . X-Ray photoelectron spectra (XPS) were measured on a Kratos Axis Ultra X-ray photoelectron spectrometer equipped with an aluminium/magnesium dual anode and a monochromated aluminium X-ray source.

### Synthesis of ligand

3,5-Dicarboxy-1-methylpyridinium chloride was synthesized according to a previously reported procedure.<sup>1</sup> Diethyl pyridine-3,5-dicarboxylate hydrochloride (10.0 g, 23.79 mmol) and iodomethane (10mL) were placed into a 250 mL round bottomed flask and dissolved in a mixture of toluene and acetonitrile (2:1, 90mL). The flask was stirred overnight at  $65^\circ\text{C}$  and the solvent removed under vacuum to give a residue which was dissolved in 100 mL of 50% HCl. This aqueous solution was heated at  $90^\circ\text{C}$  for 7 days after which the solvent was removed under vacuum and the residue washed with acetone. The white product was dried at  $60 \text{ }^\circ\text{C}$  (isolated yield: 5.0 g, 90%).  $^1\text{H NMR}$  (300 MHz,  $\text{D}_2\text{O}$ ):  $\delta$  9.17 (s, 2H), 9.11 (s, 2H), 4.400 (s, 3H), MS (ESI)  $m/z$  ( $\text{M}-\text{Cl}$ ) $^+$ : 182.109 (100%).

3,5-Dicarboxy-1-methyl( $d_3$ )pyridinium chloride was synthesized according to the same procedure but starting with iodomethane- $d_3$ .

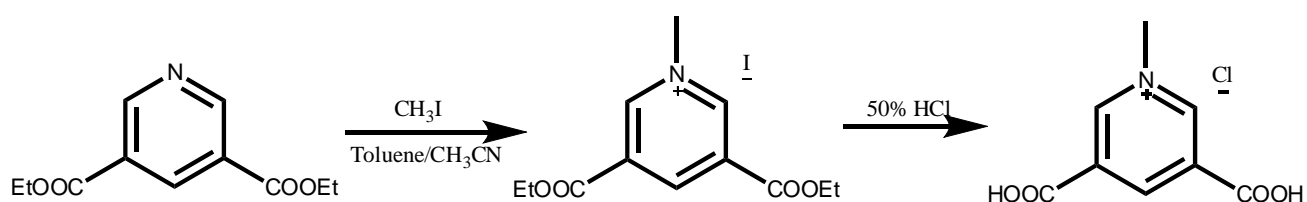

### Synthesis of MFM-305-CH<sub>3</sub>

3,5-Dicarboxy-1-methylpyridinium chloride (84 mg, 0.4 mmol) and AlCl<sub>3</sub>·6H<sub>2</sub>O (46.2 mg, 0.2 mmol) were placed in a Teflon lined stainless-steel autoclave and dissolved in a mixture of MeOH and H<sub>2</sub>O (1.235/0.103 mL). The vial was sealed and heated at 130 °C for 3 days. The material was obtained as white powder and washed with MeOH and dried in air. (isolated yield = 45%). Elemental Analysis for MFM-305-CH<sub>3</sub>·3H<sub>2</sub>O: [found (calc.%)]: C 31.64(30.64), H 4.01(4.18), N 5.4(4.47), Cl 12.20(11.30).

### Synthesis of MFM-305-CD<sub>3</sub>

Deuterated MFM-305-CD<sub>3</sub> was synthesized according to the same procedure as above but using 3,5-dicarboxy-1-methyl(*d*<sub>3</sub>)pyridinium chloride.

### Synthesis of MFM-305

MFM-305 was synthesized by heating MFM-305-CH<sub>3</sub> at 180 °C under vacuum for 16 h. Elemental analysis for MFM-305·3H<sub>2</sub>O: [found (calc.%)]: C 31.32(31.95), H 3.92(3.83), N 5.00(5.32).

### Gas Adsorption Isotherms

Sorption isotherms for N<sub>2</sub>, CO<sub>2</sub> and SO<sub>2</sub> were recorded at 77 K (liquid N<sub>2</sub>), 195 K (acetone-dry ice) or at 273-298 K (temperature-programmed water bath) using a 3Flex system (Micromeritics Instrument Corporation, USA) and a Xemis (Hiden) under ultra-high vacuum from a diaphragm and turbo pumping system. All gases used were ultra-pure research grade (99.999%) purchased from BOC or Air Liquide.

### Calculation of isosteric heats of adsorption

$$\ln P = \ln N + \sum_{i=0}^m a_i N^i + \sum_{i=0}^n \binom{n}{k} b_i N^i$$
$$Q_{st} = -R \sum_{i=0}^m a_i N^i$$

A virial-type expression of the above form was used to fit the combined isotherm data at 273 and 298 K, where  $P$  is the pressure,  $N$  is the adsorbed amount in mmol/g,  $T$  is the temperature in K,  $a_i$  and  $b_i$  are virial coefficients, and  $m$  and  $n$  are the number of coefficients used to describe the isotherms.  $Q_{st}$  is the coverage-

dependent enthalpy of adsorption and  $R$  is the universal gas constant.

### **Analysis and Derivation of the Ideal Adsorption Solution Theory (IAST) Selectivity**

Ideal Adsorbed Solution Theory (IAST) was used to determine the selectivity factor,  $S$ , for binary mixtures using pure component isotherm data.  $S$  is defined according to the equation,

$$S = \frac{x_1 / y_1}{x_2 / y_2}$$

where  $x_i$  is the amount of each component adsorbed, as determined by IAST and  $y_i$  is the mole fraction of each component in the gas phase at equilibrium. The IAST adsorption selectivities were calculated for binary mixture of CO<sub>2</sub>/N<sub>2</sub>, SO<sub>2</sub>/N<sub>2</sub> at concentrations of 1:99 to 50:50 at 298 K up to a pressure of 1 bar.

### **Breakthrough experiments**

Breakthrough experiments were carried out in a 7 mm diameter tube of 120 mm length packed with ~3 g of MFM-305 powder (particle size < 5 μm). The total volume of the bed was about 5 cm<sup>3</sup>. The sample was heated at 100 °C under a flow of He for 2 days for complete activation. The fixed bed was then cooled to room temperature (298 K) using a temperature-programmed water bath and the breakthrough experiment performed with a stream of 0.25% SO<sub>2</sub> (diluted in He and N<sub>2</sub>) at atmospheric pressure and room temperature. The flow rate of the entering gas mixture was maintained at 40 ml min<sup>-1</sup>, and the gas concentration,  $C$ , of SO<sub>2</sub> and N<sub>2</sub> at the outlet was determined by mass spectrometry and compared with the corresponding inlet concentration  $C_0$ , where  $C/C_0 = 1$  indicates complete breakthrough.

### ***In situ* neutron powder diffraction (NPD)**

Prior to NPD experiments, MFM-305-CH<sub>3</sub> was thermally activated at 110 °C for 96 h under dynamic vacuum. Time-of-flight NPD measurements were carried out on the GEM diffractometer at the pulsed neutron source at the ISIS Facility, Rutherford Appleton Laboratory, UK. The solvent-free material, 1.7 g, was loaded into a vanadium cell, and the sample cooled *in situ* using a He cryostat. The NPD measurements were performed at 7K. Diffraction data as a function of neutron time-of-flight were collected from the sample in five GEM detector banks centred at  $2\theta = 9.1, 18.0, 35.1, 63.9, \text{ and } 94.4^\circ$ . Data were normalized to the wavelength distribution of the incident neutron beam, and focused into 5 separate histograms, one for each detector bank.

After collecting the NPD data for the bare material, CO<sub>2</sub> loadings up to 1.0 CO<sub>2</sub> per Al were introduced from a calibrated volume. The CO<sub>2</sub> loadings were performed at 298 K and the sample cooled to 7 K after all the gas had been adsorbed, allowing sufficient time to achieve thermal equilibrium before data collection.

### ***In situ* powder diffraction data collection and Rietveld refinement**

High resolution *in situ* synchrotron powder X-ray diffraction (PXRD) data were collected at Beamline I11 of Diamond Light Source using multi-analysing crystal-detectors and monochromated radiation ( $\lambda = 0.825582 \text{ \AA}$ ). These *in situ* diffraction measurements were carried out in capillary mode and the temperature controlled by an Oxford Cryosystems open-flow nitrogen gas cryostat. In a typical experiment, the powder sample of MFM-305 was dried in air and ground for 10 min before loading into a capillary tube (0.7 mm diameter). The capillary tube was connected to high vacuum ( $10^{-5}$  mbar) and heated at 130 °C for ~4 h to generate fully desolvated MFM-305. After collecting the HR-PXRD data for the bare material, gas was loaded up to 1 bar at 298 K. After dosing, ~30 mins were allowed for equilibration and the sample was then cooled to measurement temperature, allowing sufficient time to achieve thermal equilibrium before data collection. The powder pattern of MFM-305-CH<sub>3</sub>, MFM-305, CO<sub>2</sub>@MFM-305-CH<sub>3</sub>, SO<sub>2</sub>@MFM-305-CH<sub>3</sub>, CO<sub>2</sub>@MFM-305, SO<sub>2</sub>@MFM-305 were collected.

Variable temperature *in situ* synchrotron X-ray diffraction data were also collected at Beamline I11 of Diamond Light Source. These *in situ* diffraction measurements were carried out in capillary mode with a CO<sub>2</sub> supply line which can control the pressure accurately, and the temperature was controlled by an Oxford Cryosystems open-flow N<sub>2</sub> cryostat. In a typical experiment, the powder sample was loaded into a capillary tube (0.7 mm diameter) which was connected to high vacuum ( $10^{-5}$  mbar) and heated at 130 °C for ~4 h to generate the fully desolvated material. Gas was loaded into the sample up to 1 bar at room temperature and the CO<sub>2</sub> supply was then sealed to prevent the formation of dry ice in the sample cell. After dosing, ~30 min were allowed for equilibration, sufficient time to achieve thermal equilibrium. The sample was then cooled for data collection.

### **Inelastic neutron scattering**

INS spectra were recorded on the TOSCA spectrometer at the ISIS Facility at the Rutherford Appleton Laboratory, UK, and at the VISION spectrometer at Oak Ridge National Laboratory, USA for energy transfers between ~2 and 500 meV. Desolvated MFM-305-CH<sub>3</sub> and MFM-305 were loaded into a cylindrical vanadium

sample container with an annealed copper vacuum seal and connected to a gas handling system. The sample was degassed at  $10^{-7}$  mbar and  $130\text{ }^{\circ}\text{C}$  for 4 days to remove any remaining trace of guest water molecules. The temperature during data collection was controlled using a helium cryostat ( $5 \pm 0.2\text{ K}$ ). The loading of  $\text{CO}_2$  was performed at room temperature in order to ensure that  $\text{CO}_2$  was present in the gas phase when not adsorbed and also to ensure sufficient mobility of  $\text{CO}_2$  inside the crystalline structure of MFM-305- $\text{CH}_3$  and MFM-305. The temperature was reduced to below  $5\text{ K}$  in order to perform the scattering measurements with the minimum achievable thermal motion for  $\text{CO}_2$ . Background spectra were subtracted to obtain the difference spectra. INS was used to study the binding interaction and structure dynamics in these gas loaded materials.

### **DFT Calculations for INS Spectroscopy**

Modelling using Density Functional Theory (DFT) of the bare and  $\text{CO}_2$ -loaded MOFs was performed using the Vienna Ab initio Simulation Package (VASP).<sup>2</sup> The calculation used the Projector Augmented Wave (PAW) method<sup>3,4</sup> to describe the effects of core electrons, and Perdew-Burke-Ernzerhof (PBE)<sup>5</sup> implementation of the Generalized Gradient Approximation (GGA) for the exchange-correlation functional. Energy cutoff was  $500\text{ eV}$  for the plane-wave basis of the valence electrons. The lattice parameters and atomic coordinates determined by NPD in this work were used as the initial structure. Some of the  $\text{CO}_2$  sites have partial occupancy, and to account for this properly a supercell calculation would be desirable, but too costly in practice. Instead, a single unit cell was used and the partially occupied sites modified to be either occupied or unoccupied, according to their local environment and symmetry (there needs to be either a complete  $\text{CO}_2$  molecule or no molecule, and the overall probability of being occupied needs to be proportional to the actual occupancy). The total energy tolerance for electronic energy minimization was  $10^{-8}\text{ eV}$ , and  $10^{-7}\text{ eV}$  for structure optimization. The maximum interatomic force after relaxation was below  $0.001\text{ eV}/\text{\AA}$ . The optB86b-vdW functional<sup>6</sup> was applied for dispersion corrections. The vibrational eigen-frequencies and modes were then calculated by solving the force constants and dynamical matrix using Phonopy.<sup>7</sup> The aClimax software<sup>8</sup> was used to convert the DFT-calculated phonon results to the simulated INS spectra.

### ***In situ* Solid state $^2\text{H}$ NMR Spectroscopy**

$^2\text{H}$  NMR spectroscopic experiments were performed at Larmor frequency  $\omega_z/(2\pi) = 61.42\text{ MHz}$  on a Bruker Avance 400 spectrometer using a high power probe with  $5\text{ mm}$  horizontal solenoid coil. All  $^2\text{H}$  NMR spectra were obtained by Fourier transformation of quadrature-detected phase-cycled quadrupole echo arising

in the pulse sequence ( $90^\circ_x - \tau_1 - 90^\circ_y - \tau_2 - \text{acquisition} - t$ ), where  $\tau_1 = 20 \mu\text{s}$ ,  $\tau_2 = 22 \mu\text{s}$ , and  $t$  is a repetition time of the sequence during the accumulation of the NMR signal. The duration of the  $\pi/2$  pulse was  $1.6 \mu\text{s}$ . Spectra were obtained typically with 50–1000 scans with repetition time ranging from 1 to 15 s. Inversion-recovery experiments to derive spin-lattice relaxation times ( $T_1$ ) were carried out using the pulse sequence ( $180^\circ_x - t_v - 90^\circ_x - \tau_1 - 90^\circ_y - \tau_2 - \text{acquisition} - t$ ), where  $t_v$  is the variable delay between the  $180^\circ$  and  $90^\circ$  pulses. The sample was then heated at 433 K for 24 h under vacuum of  $10^{-5}$  Torr (1 Torr = 133.3 Pa). After the sample was cooled to room temperature, the sample was loaded with a defined amount of  $\text{CO}_2$  and sealed. The loading was  $\sim 1.0$  molecules per Al(III) center of the sample. The adsorption was performed from the gas phase with the powder at 77K. The sealed gas-loaded sample was then left at room temperature for several days to obtain a uniform distribution of the adsorbed  $\text{CO}_2$  over the sample. The temperature of the samples was controlled with a flow of  $\text{N}_2$  gas using a variable-temperature unit BVT-3000 with a precision of about 1 K. The  $^2\text{H}$  NMR line shape analysis and numerical simulation of the spin-lattice relaxation ( $T_1$ ) temperature dependence curves were performed using in-house FORTRAN routines based on the general formalism reported elsewhere.

### ***In situ* IR spectroscopy**

*In situ* IR spectroscopic studies on MFM-305- $\text{CH}_3$  and MFM-305 were carried out on the Multimode InfraRed Imaging and Microspectroscopy (MIRIAM) beam line at Diamond Light Source. The instrument is comprised of a Bruker Hyperion 3000 microscope in transmission mode with a 15x objective and a liquid  $\text{N}_2$  cooled MCT detector coupled to a Bruker Vertex 80 V Fourier Transform IR interferometer using radiation generated from a bending magnet source. Spectra were collected (256 scans) in the range  $650\text{--}4000 \text{ cm}^{-1}$  at  $4 \text{ cm}^{-1}$  resolution and an infrared spot size at the sample of approximately  $25 \times 25 \mu\text{m}$ . MFM-305- $\text{CH}_3$  and MFM-305 were placed onto a ZnSe disk and placed within a Linkam FTIR 600 gas-tight sample cell equipped with ZnSe windows, a heating stage and gas inlet and outlets. He and  $\text{CO}_2$  were pre-dried using individual zeolite filters. The analysis gases were dosed volumetrically into the sample cell using mass flow controllers, the total flow rate being maintained at  $100 \text{ cm}^3 \text{ min}^{-1}$  for all experiments. The gases were directly vented to an exhaust system, and the total pressure in the cell was 1 bar for all experiments. Dry He and  $\text{CO}_2$  were dosed as a function of partial pressure maintaining a total flow of  $100 \text{ cm}^3 \text{ min}^{-1}$ .

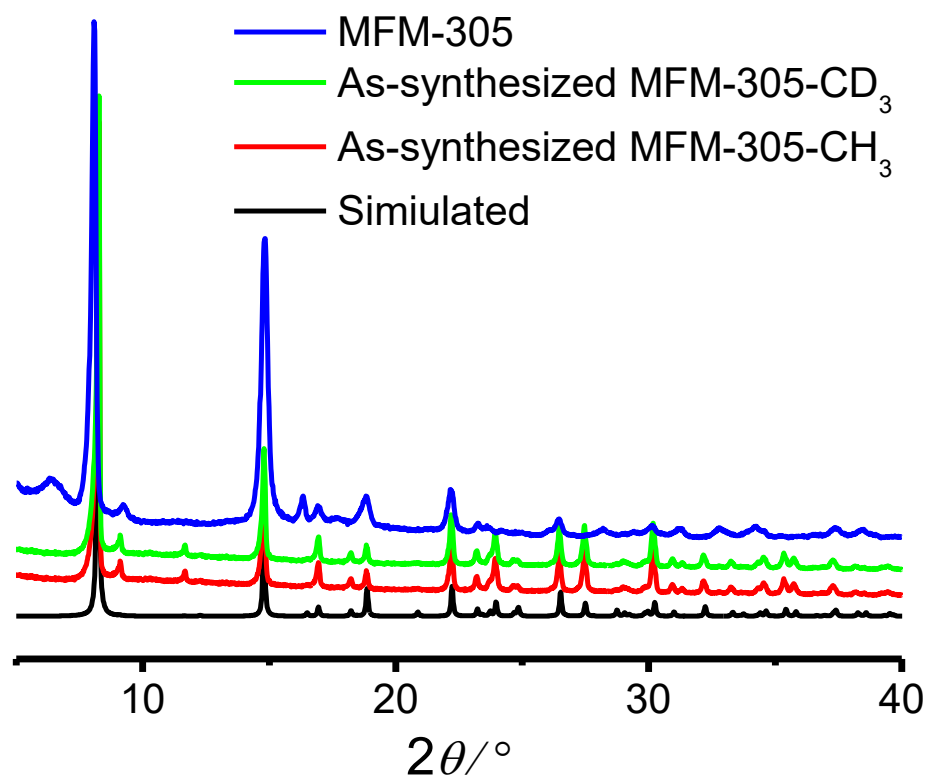

**Figure S1.** PXRD patterns for MFM-305- $\text{CH}_3$  and MFM-305.



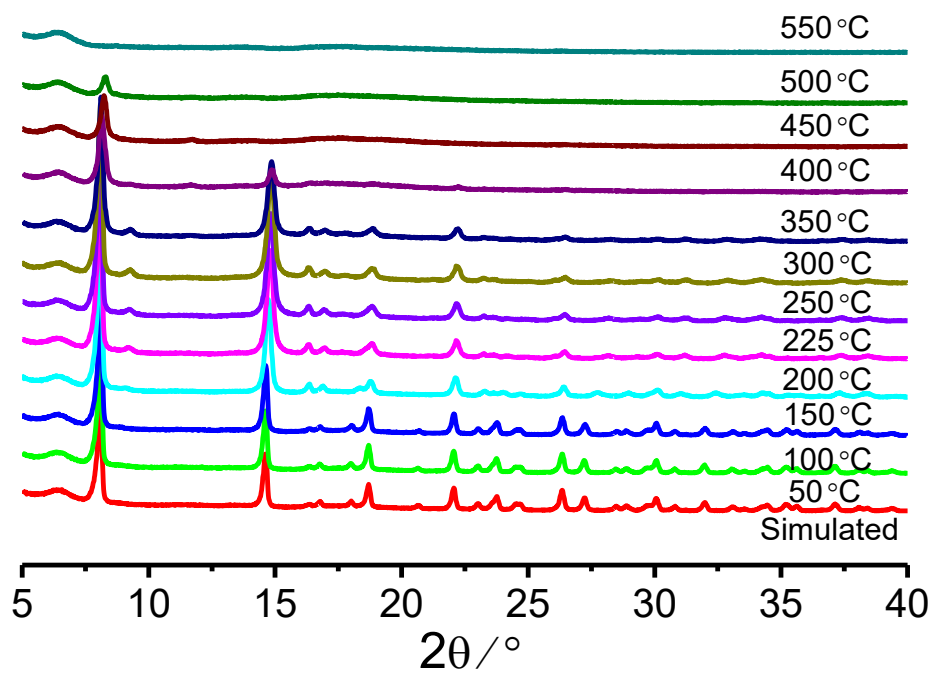

**Figure S2.** Variable temperature PXRD patterns for MFM-305-CH<sub>3</sub>.

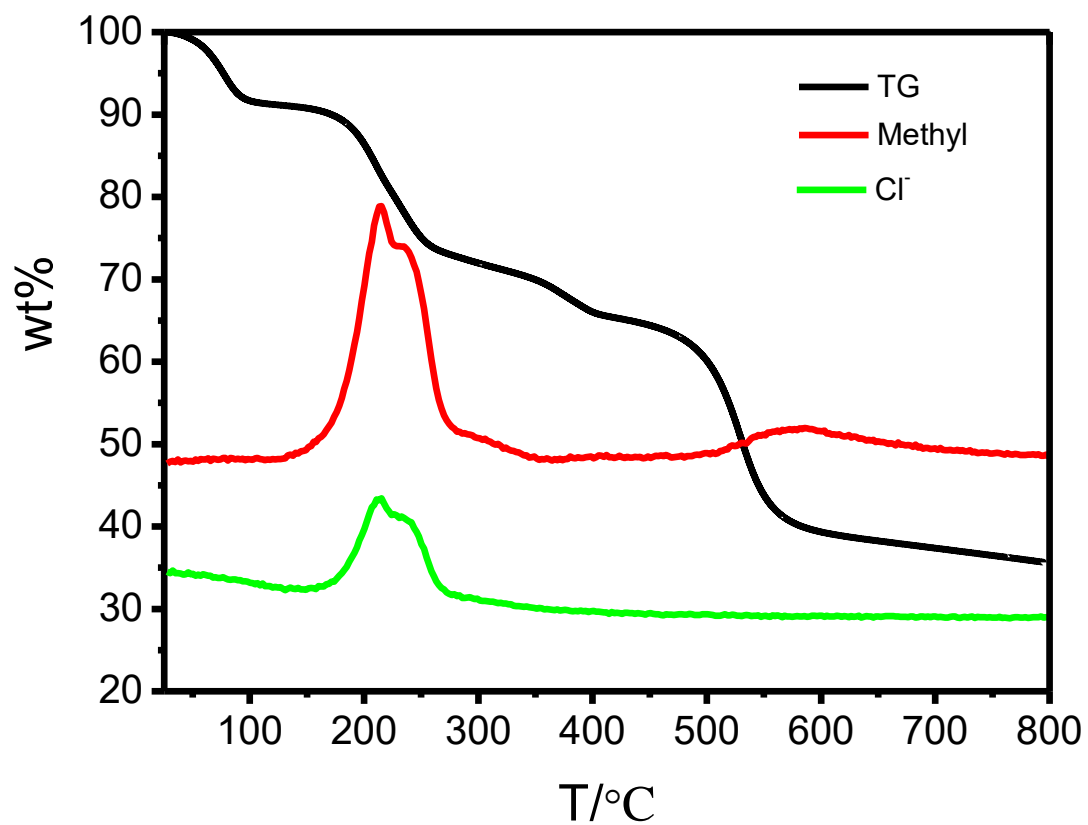

**Figure S3.** Thermogravimetric and mass spectrometric data for MFM-305-CH<sub>3</sub>.

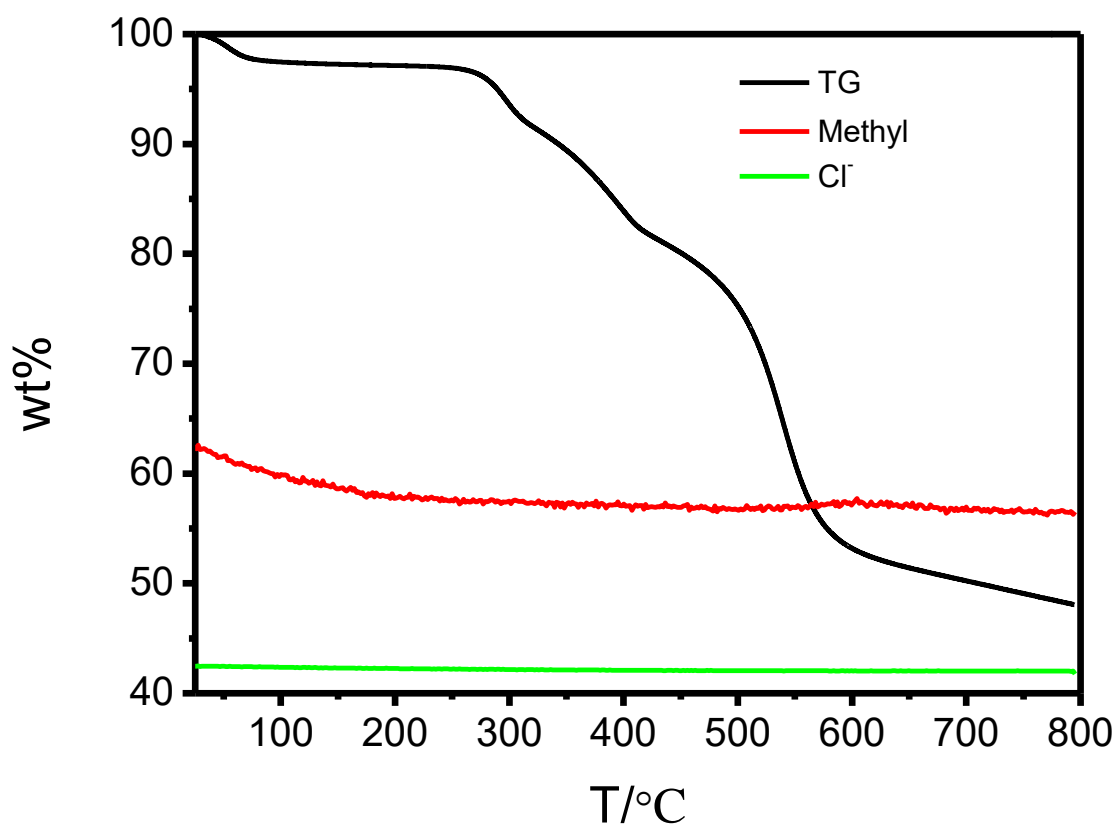

**Figure S4.** Thermogravimetric and mass spectrometric data for MFM-305.

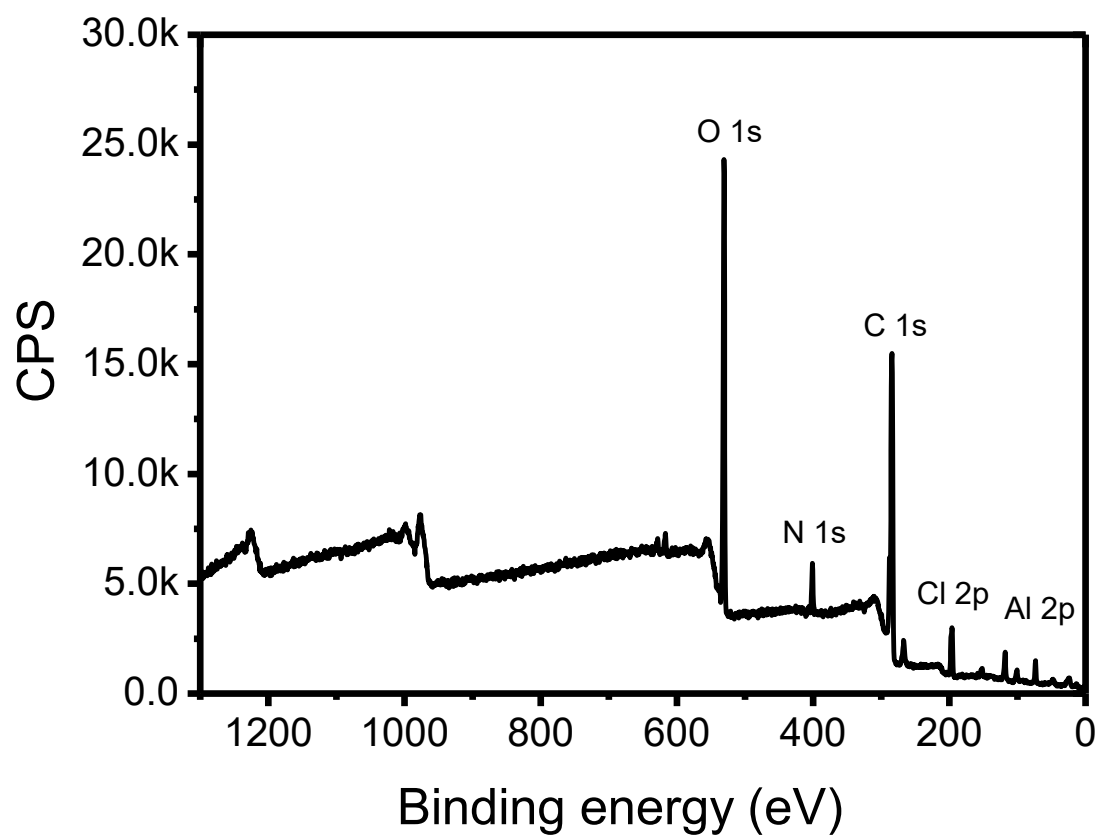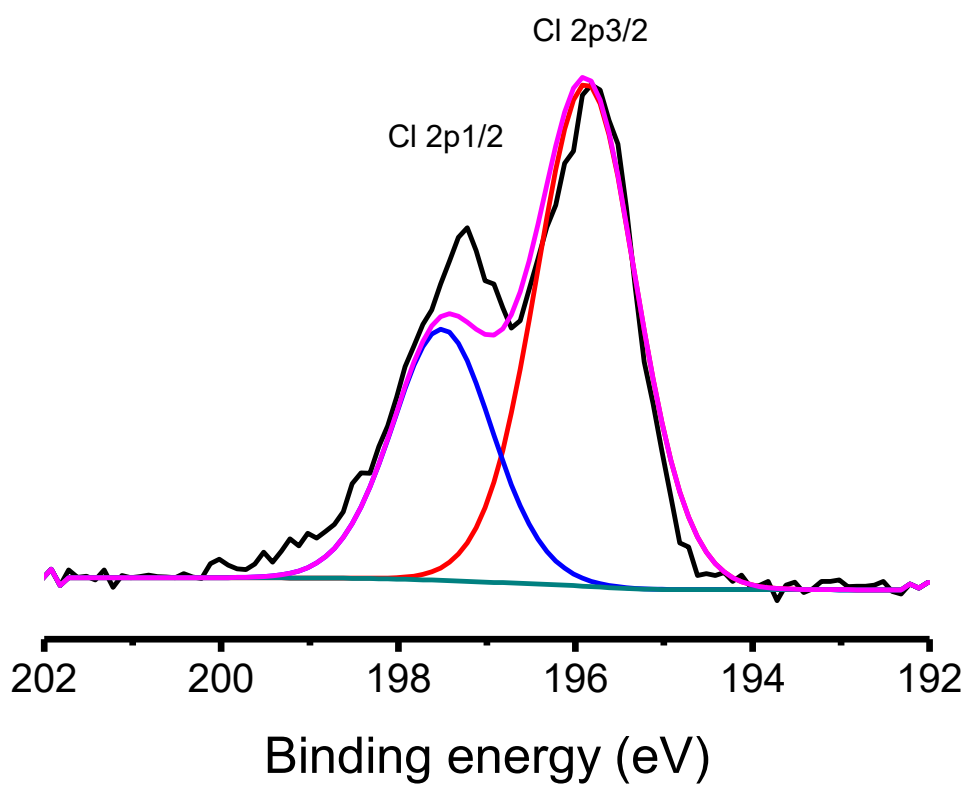

Figure S5. XPS spectra and fittings for MFM-305-CH<sub>3</sub>.

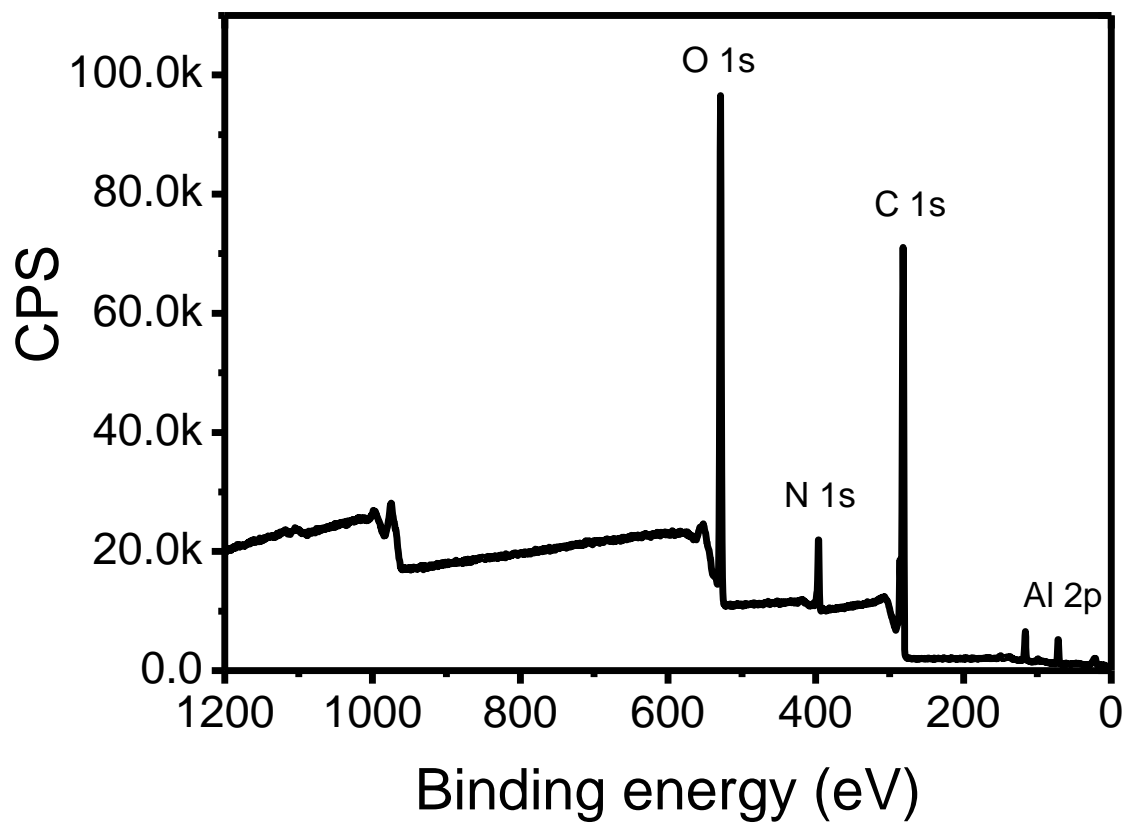

**Figure S6.** XPS spectra of MFM-305.

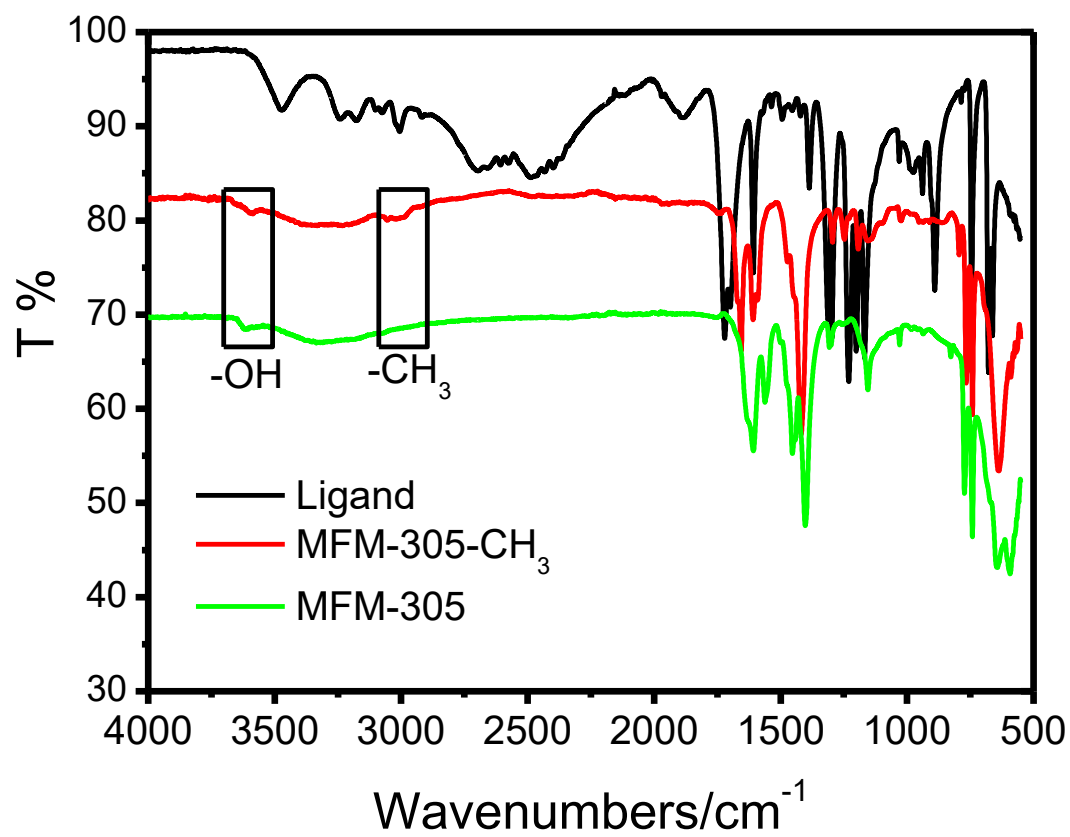

**Figure S7.** Infrared spectra of MFM-305-CH<sub>3</sub> and MFM-305.

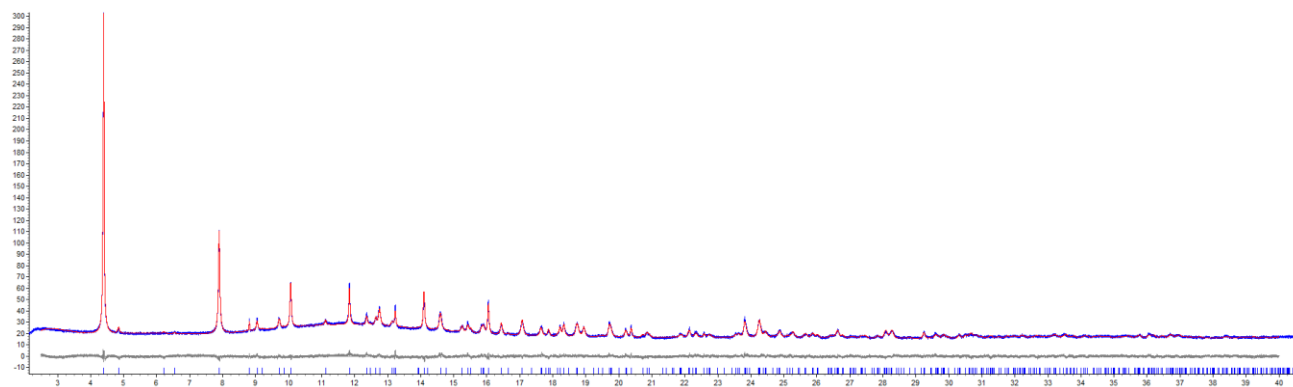

**Figure S8.** Synchrotron powder X-ray diffraction pattern and Rietveld refinement for MFM-305-CH<sub>3</sub>.

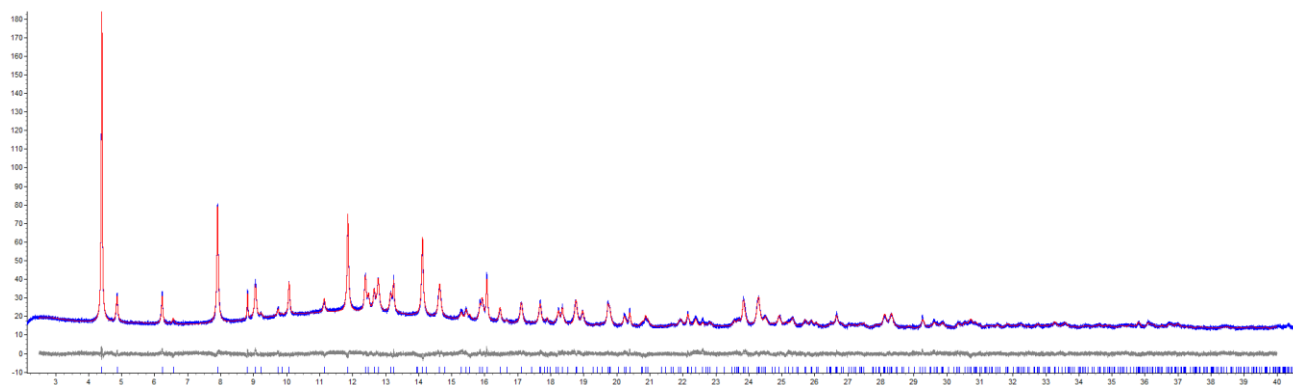

**Figure S9.** Synchrotron powder X-ray diffraction pattern and Rietveld refinement for CO<sub>2</sub>@MFM-305-CH<sub>3</sub> at 273K.

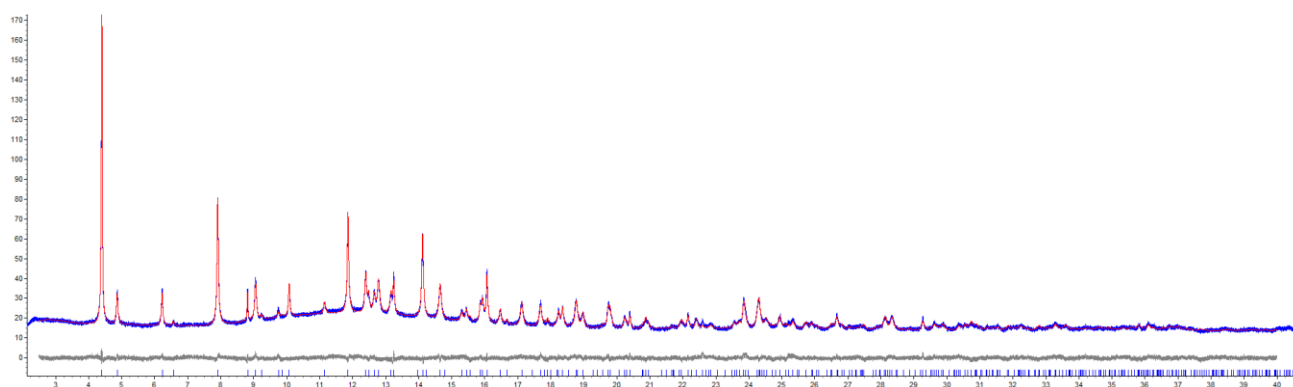

**Figure S10.** Synchrotron powder X-ray diffraction pattern and Rietveld refinement for CO<sub>2</sub>@MFM-305-CH<sub>3</sub> at 230K.

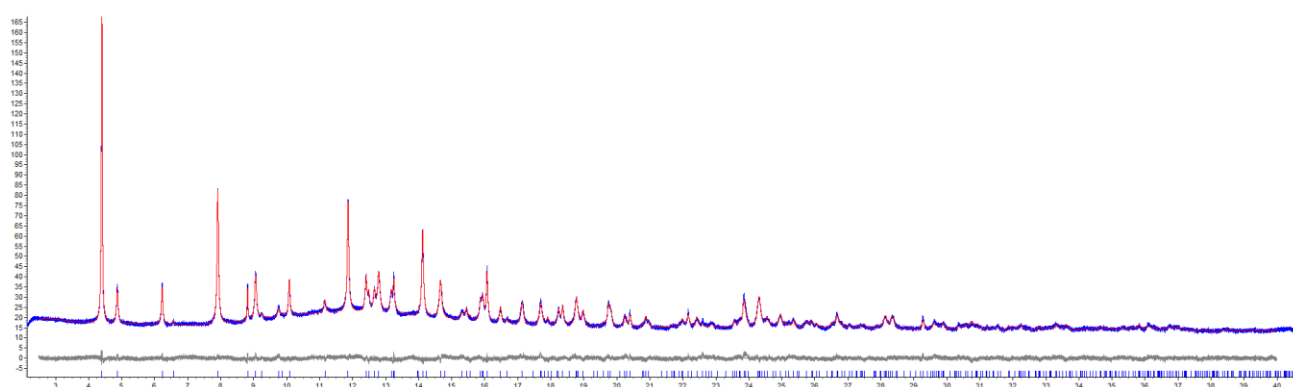

**Figure S11.** Synchrotron powder X-ray diffraction pattern and Rietveld refinement for CO<sub>2</sub>@MFM-305-CH<sub>3</sub> at 198K.

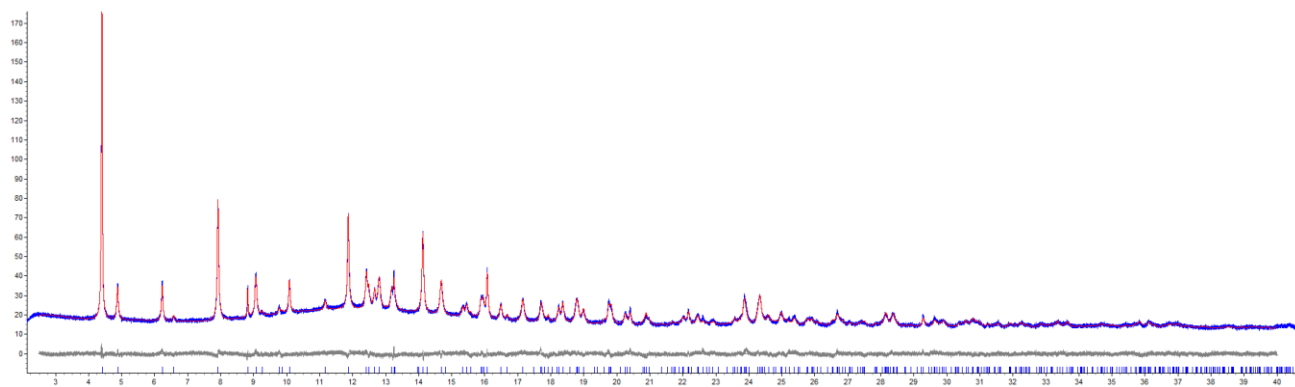

**Figure S12.** Synchrotron powder X-ray diffraction pattern and Rietveld refinement for CO<sub>2</sub>@MFM-305-CH<sub>3</sub> at 150K.

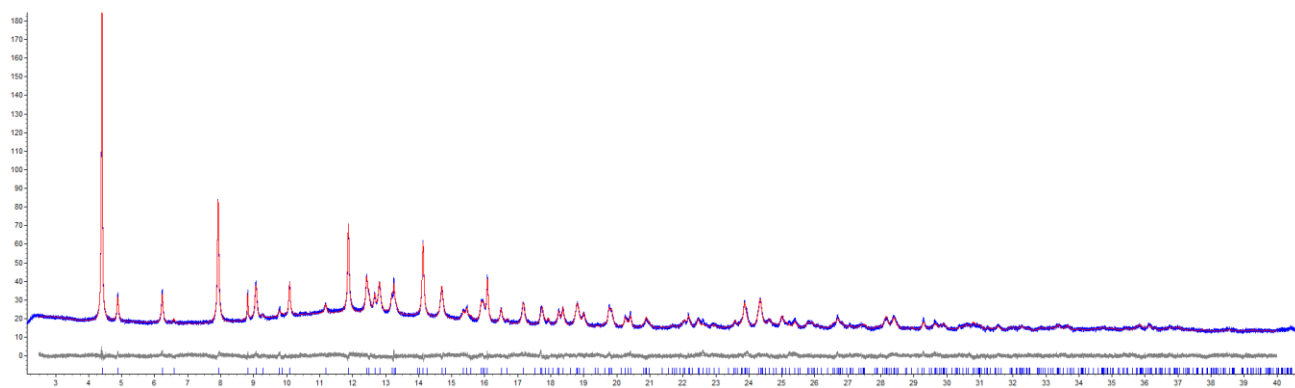

**Figure S13.** Synchrotron powder X-ray diffraction pattern and Rietveld refinement for CO<sub>2</sub>@MFM-305-CH<sub>3</sub> at 117K.



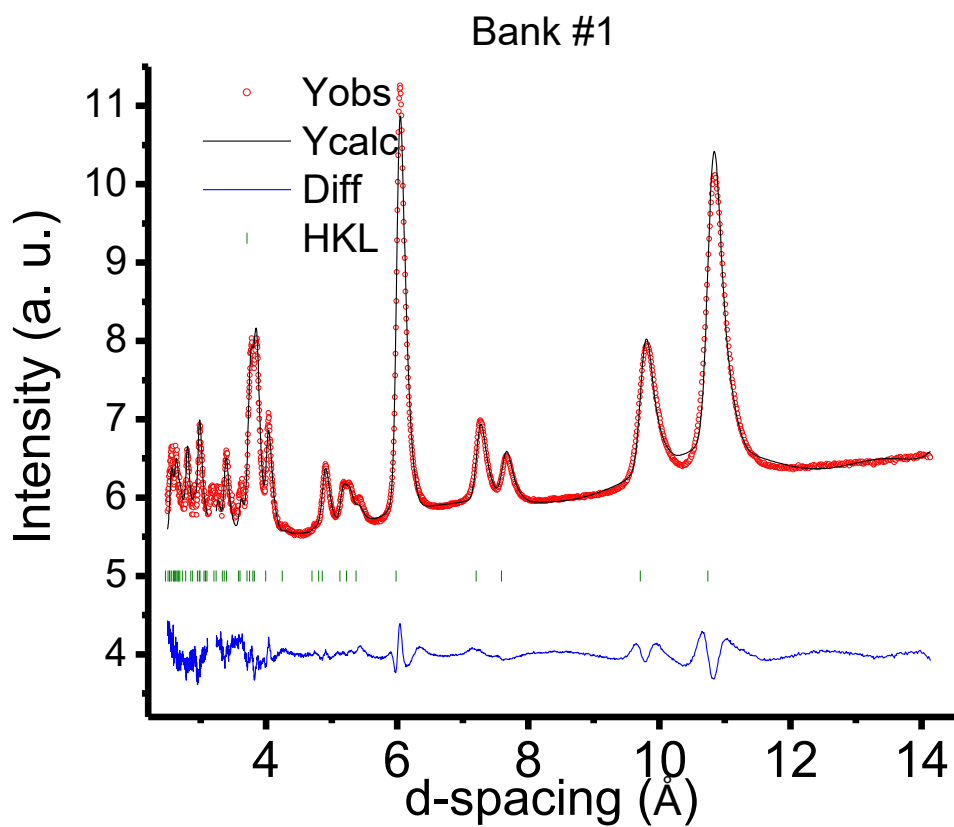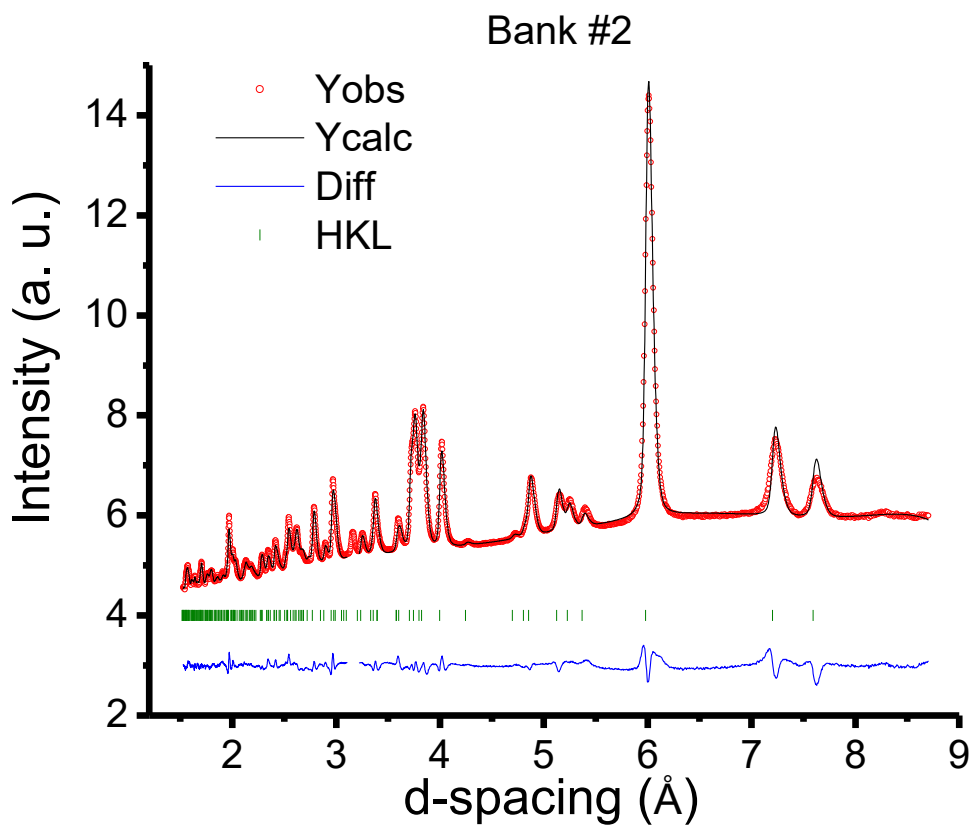

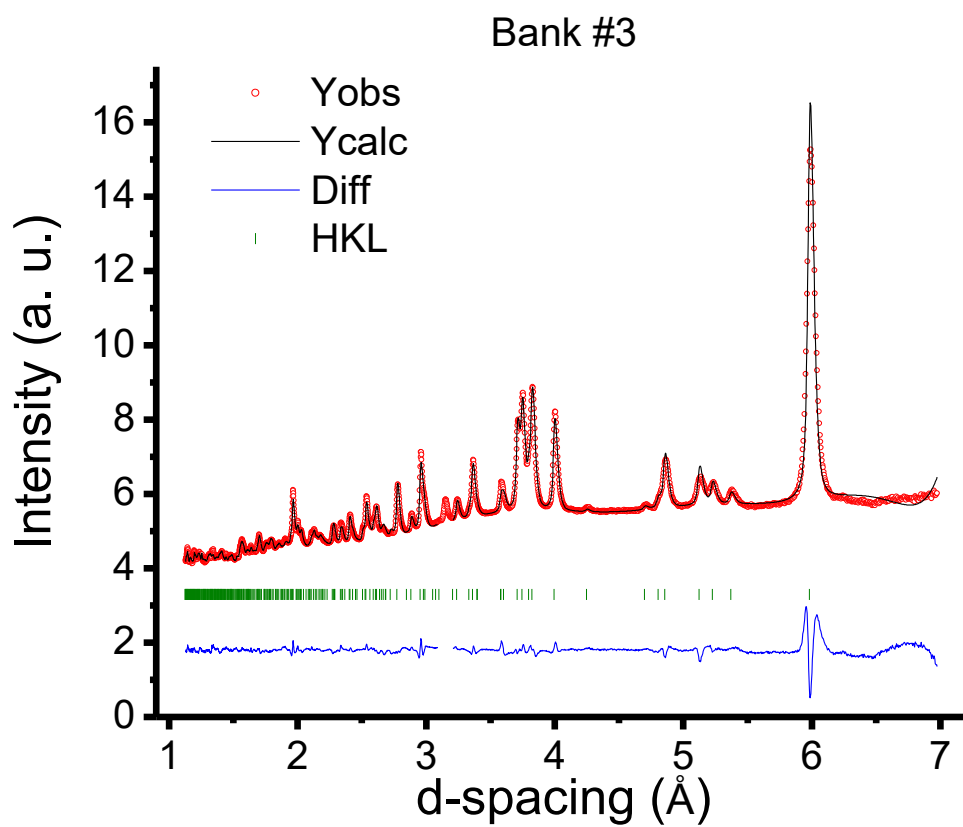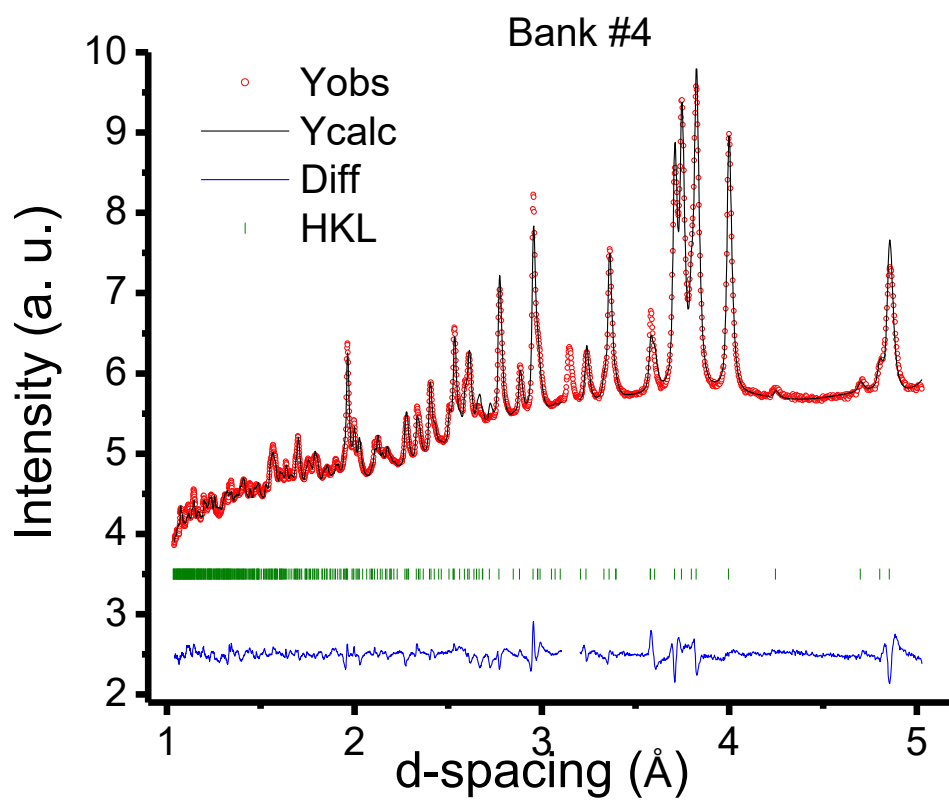

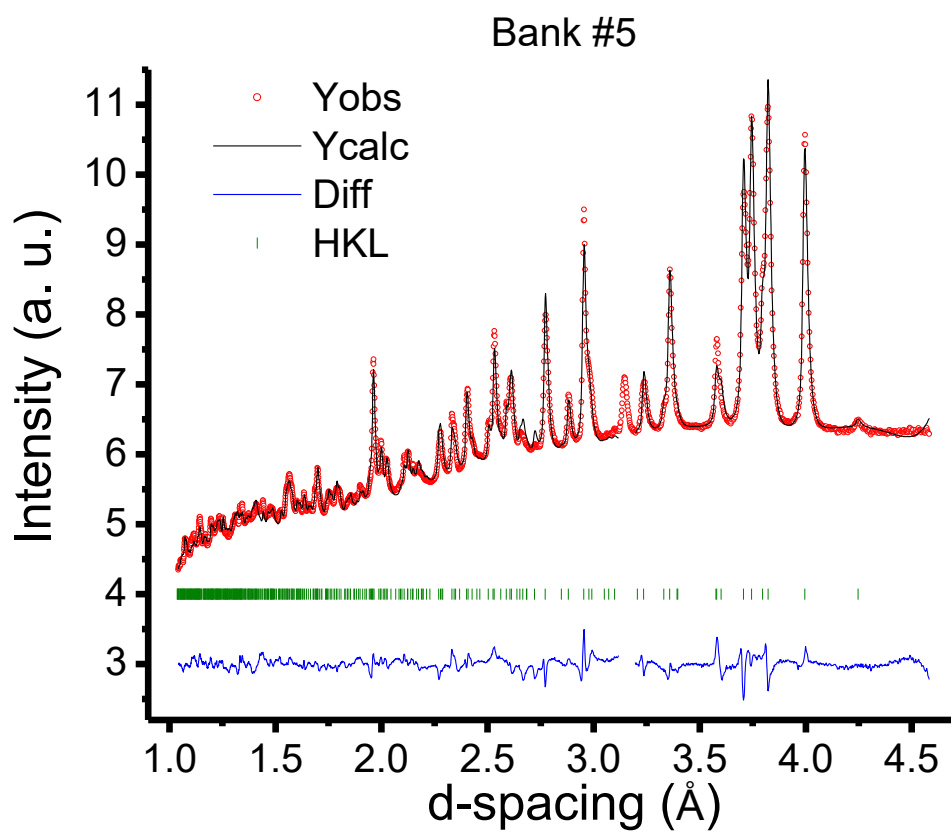

**Figure S14.** Neutron diffraction pattern and Rietveld refinement for CO<sub>2</sub>@MFM-305-CH<sub>3</sub> at 7K (banks 1 to 5).

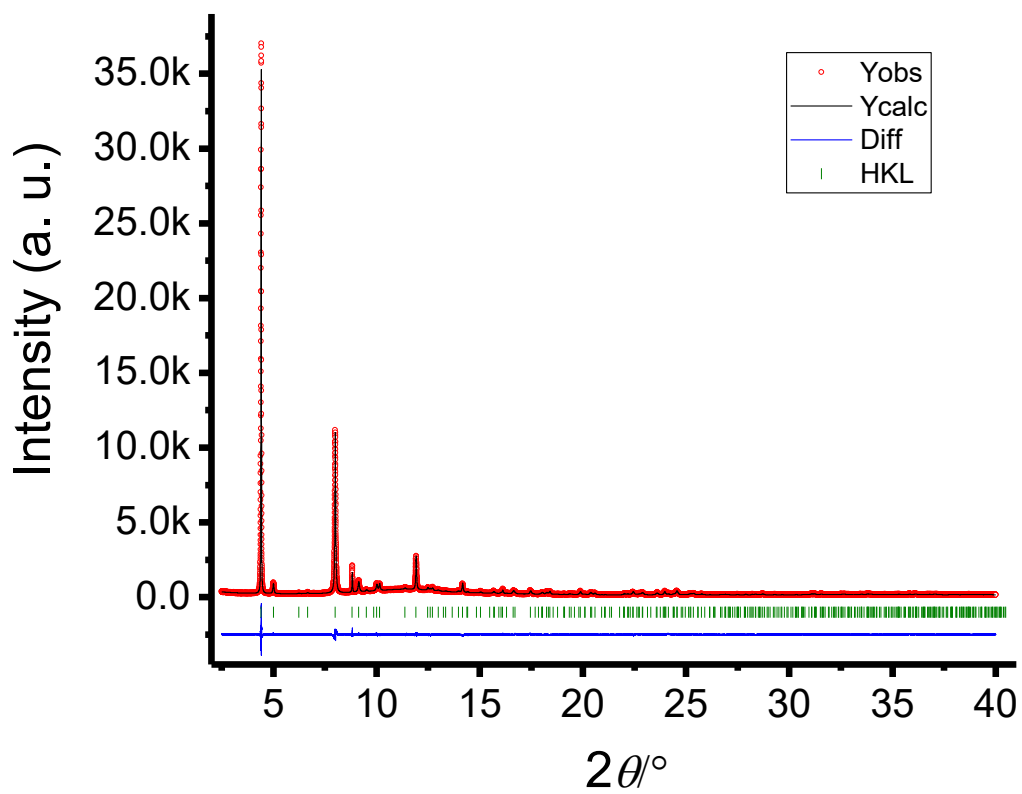

Figure S15. Synchrotron powder X-ray diffraction pattern and Rietveld refinement for MFM-305.

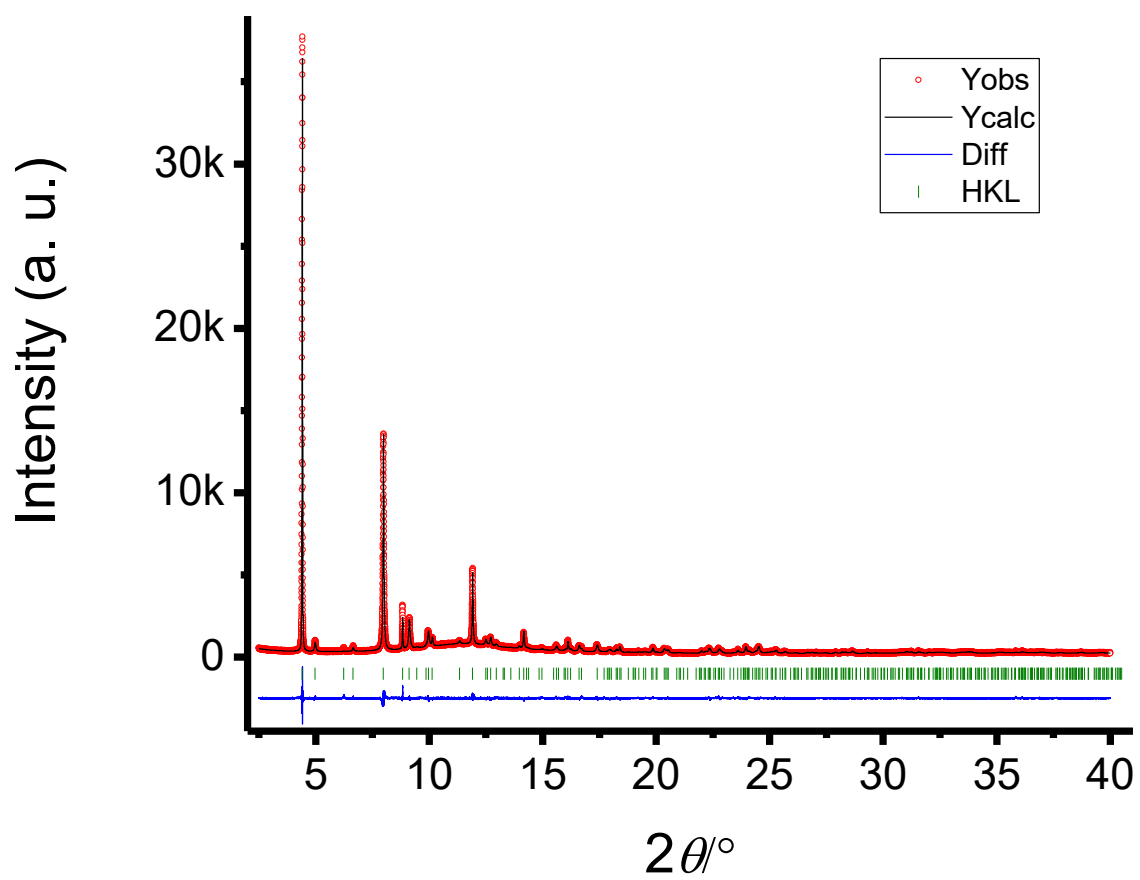

**Figure S16.** Synchrotron powder X-ray diffraction pattern and Rietveld refinement for CO<sub>2</sub>@MFM-305 at 270K.

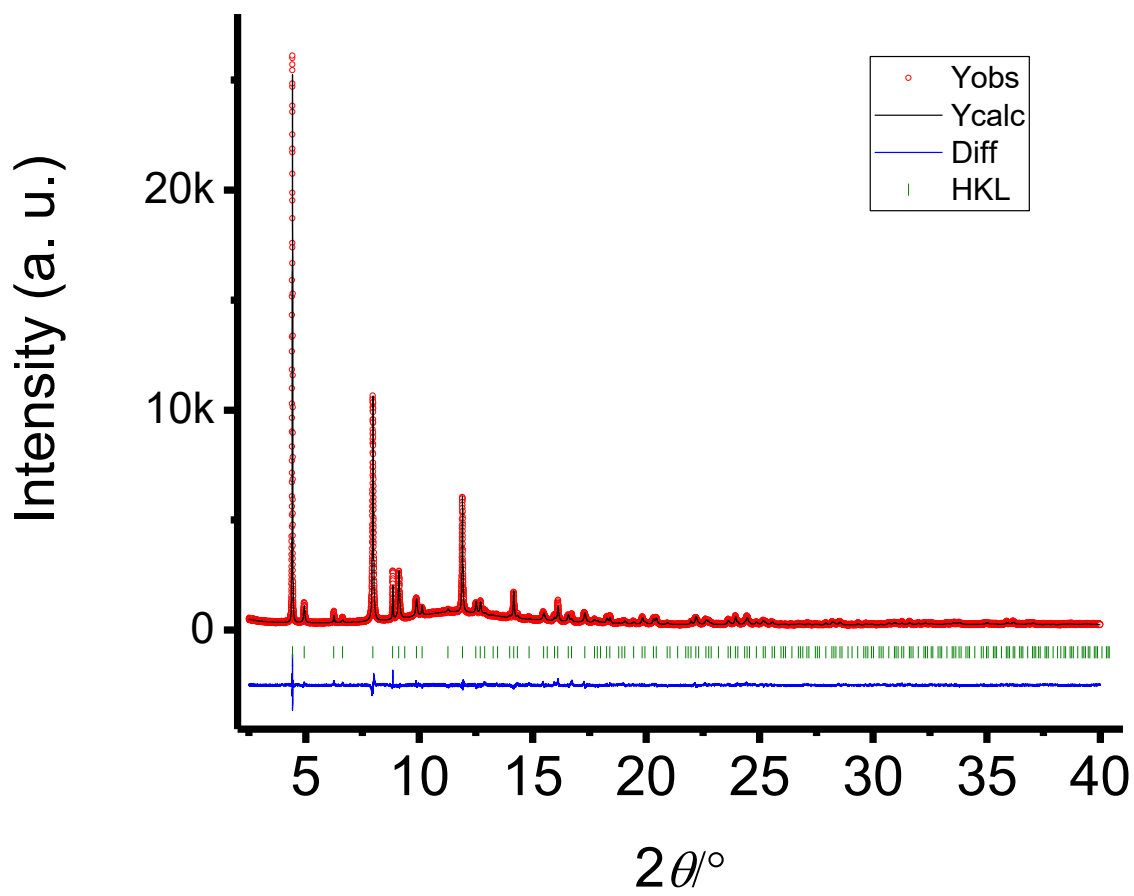

**Figure S17.** Synchrotron powder X-ray diffraction pattern and Rietveld refinement for CO<sub>2</sub>@MFM-305 at 230K.

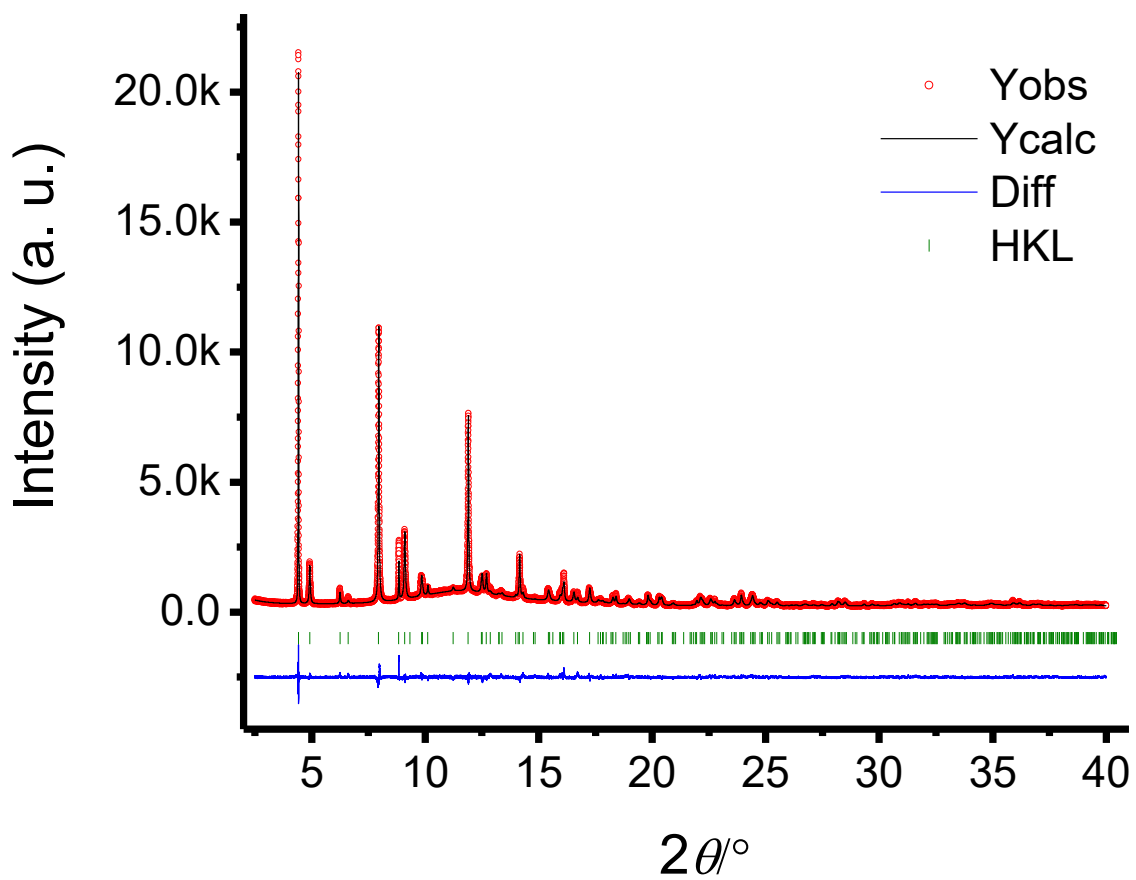

**Figure S18.** Synchrotron powder X-ray diffraction pattern and Rietveld refinement for CO<sub>2</sub>@MFM-305 at 198K.

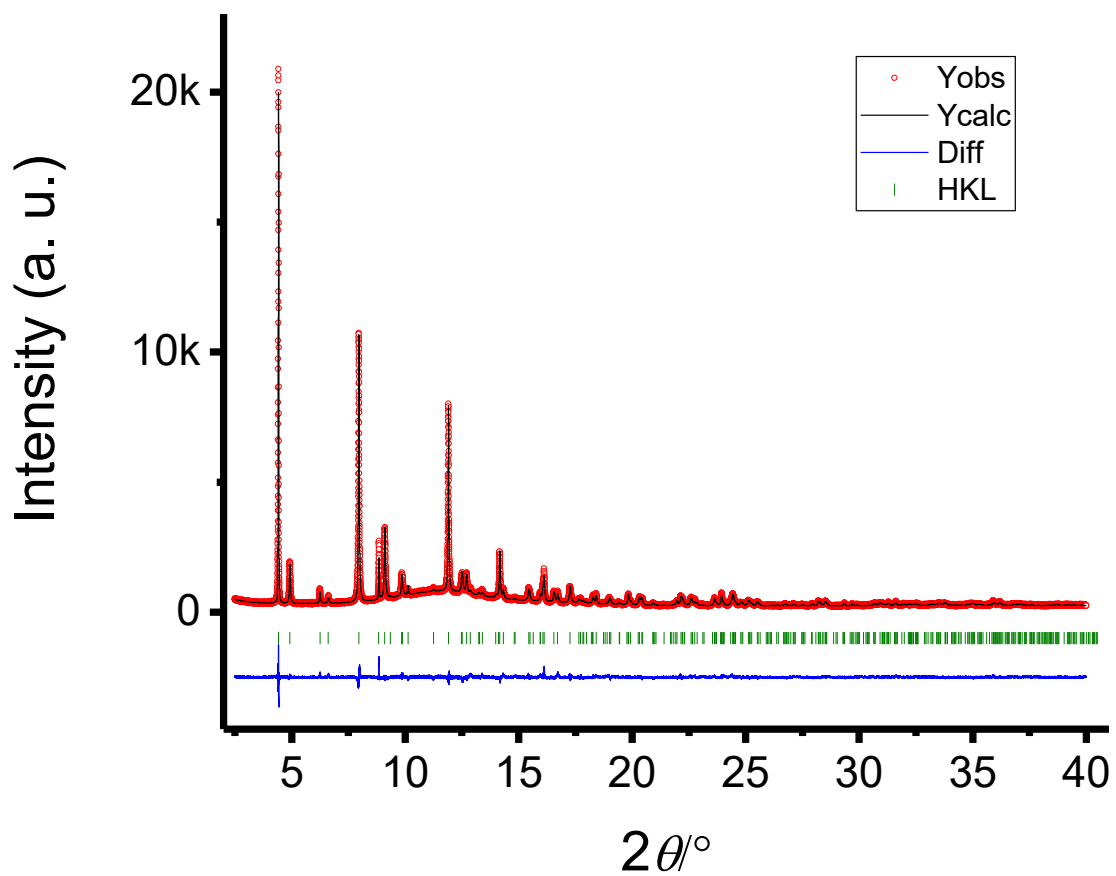

**Figure S19.** Synchrotron powder X-ray diffraction pattern and Rietveld refinement for CO<sub>2</sub>@MFM-305 at 150K.



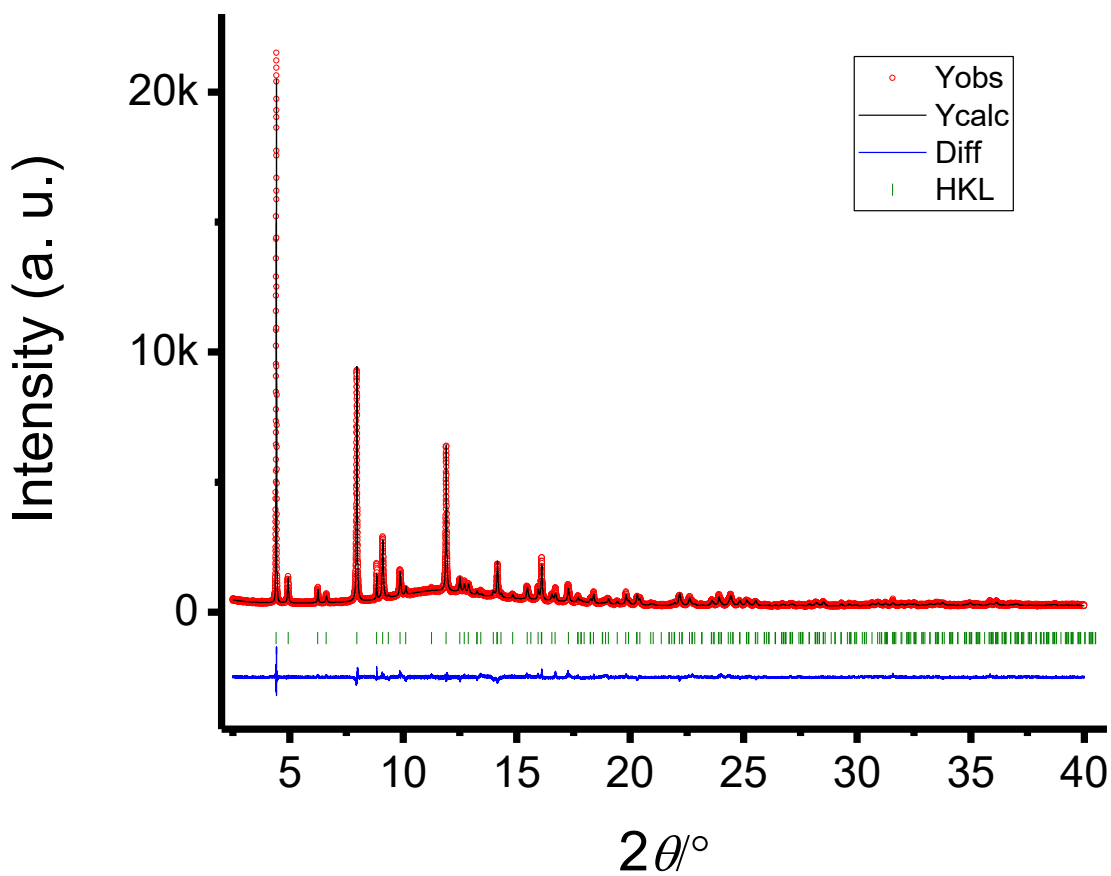

**Figure S20.** Synchrotron powder X-ray diffraction pattern and Rietveld refinement for CO<sub>2</sub>@MFM-305 at 100K.

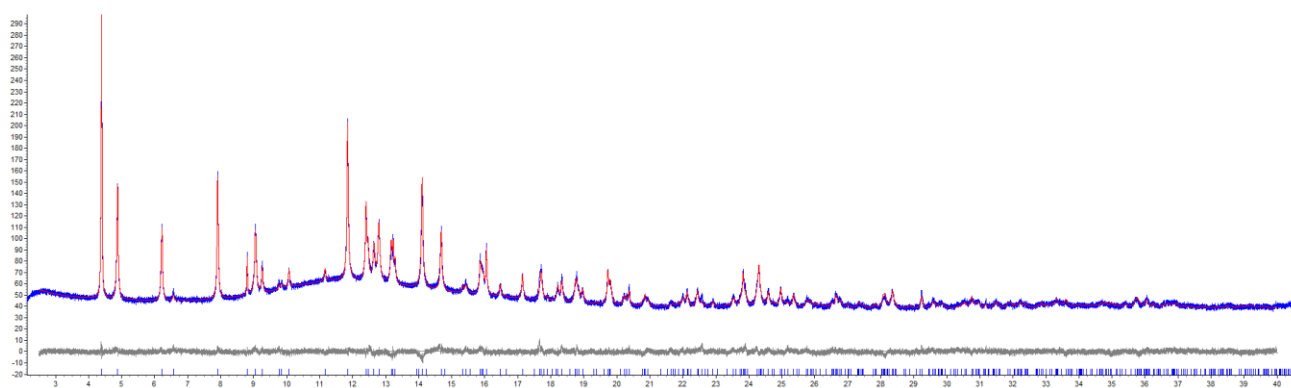

**Figure S21.** Synchrotron powder X-ray diffraction pattern and Rietveld refinement for SO<sub>2</sub>@MFM-305-CH<sub>3</sub> at 298K.

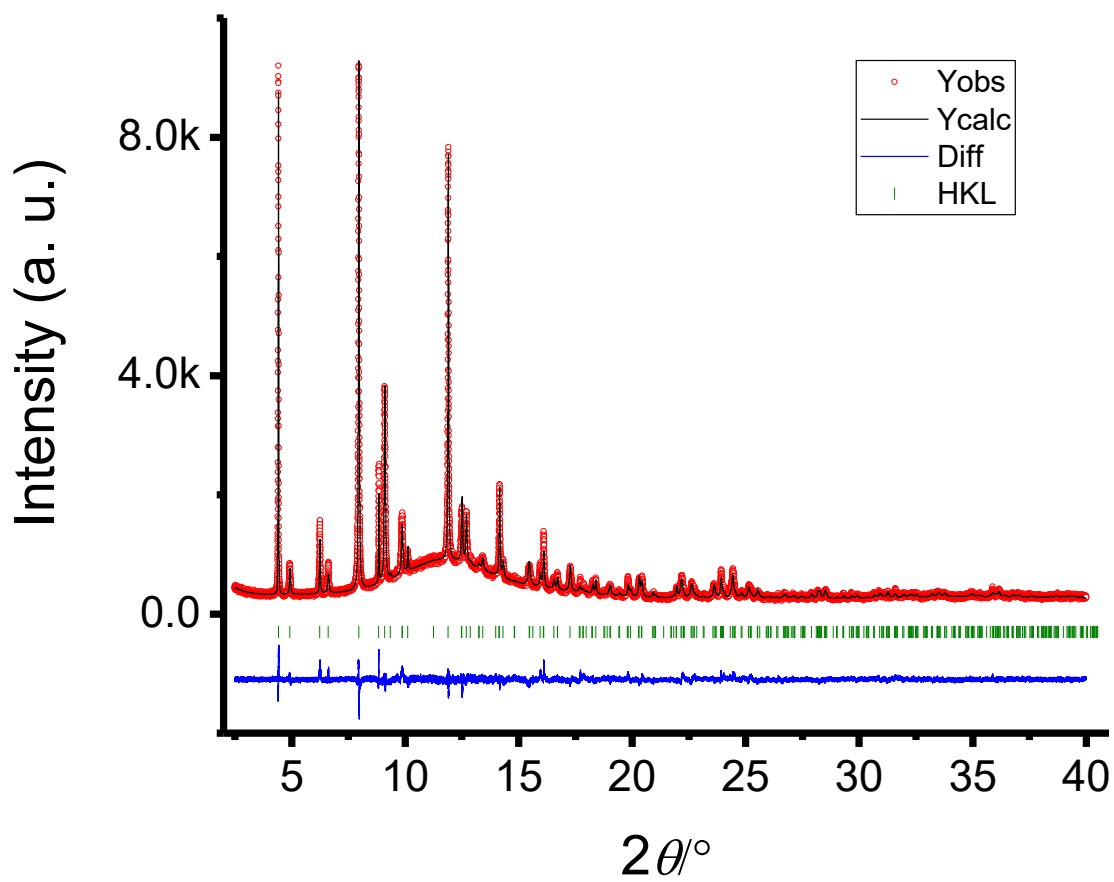

Figure S22. Synchrotron powder X-ray diffraction pattern and Rietveld refinement for SO<sub>2</sub>@MFM-305 at 298K.

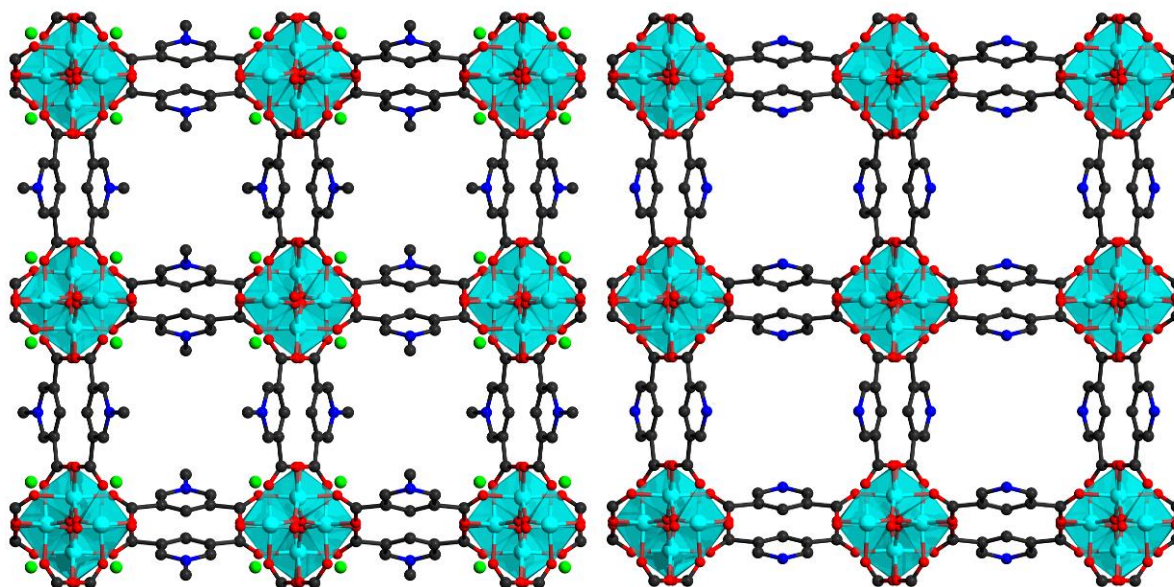

**Figure S23.** Structure of MFM-305-CH<sub>3</sub> (left) and MFM-305 (right). The structure was solved from high-resolution PXRD data. View of the three-dimensional framework structure with a channel formed along the *c*-axis. (aluminium, turquoise, carbon, grey, oxygen, red, chlorine, bright green).

**Table S1.** The adsorption capacities of N<sub>2</sub>, CO<sub>2</sub>, SO<sub>2</sub> in MFM-305-CH<sub>3</sub> and MFM-305 at 1.0 bar.

|                 |       | MFM-305-CH <sub>3</sub> /mmol g <sup>-1</sup> | MFM-305/mmol g <sup>-1</sup> |
|-----------------|-------|-----------------------------------------------|------------------------------|
| N <sub>2</sub>  | 77 K  | 5.20                                          | 11.93                        |
|                 | 298 K | 0.33                                          | 0.23                         |
| CO <sub>2</sub> | 195 K | 4.23                                          | 5.69                         |
|                 | 273 K | 2.41                                          | 3.02                         |
| SO <sub>2</sub> | 298 K | 2.67                                          | 3.55                         |
|                 | 273 K | 5.28                                          | 9.05                         |
|                 | 298 K | 5.16                                          | 6.99                         |

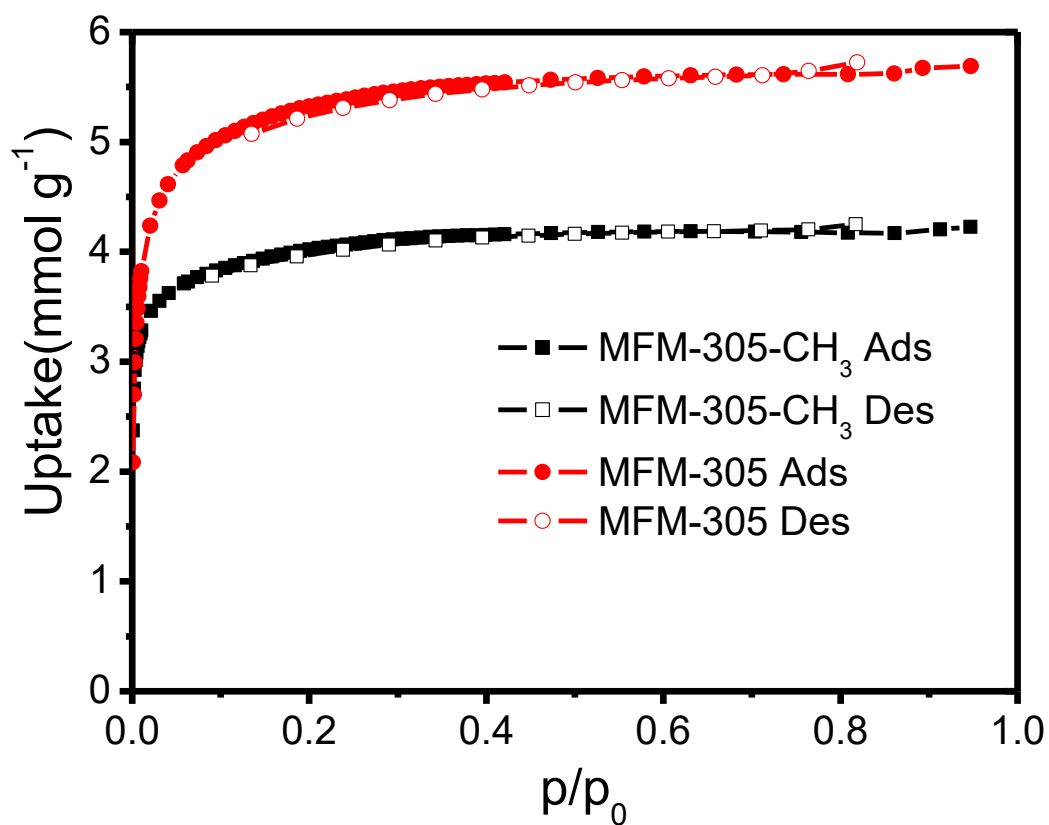

**Figure S24.** Adsorption isotherm (195K) of CO<sub>2</sub> in MFM-305-CH<sub>3</sub> and MFM-305.

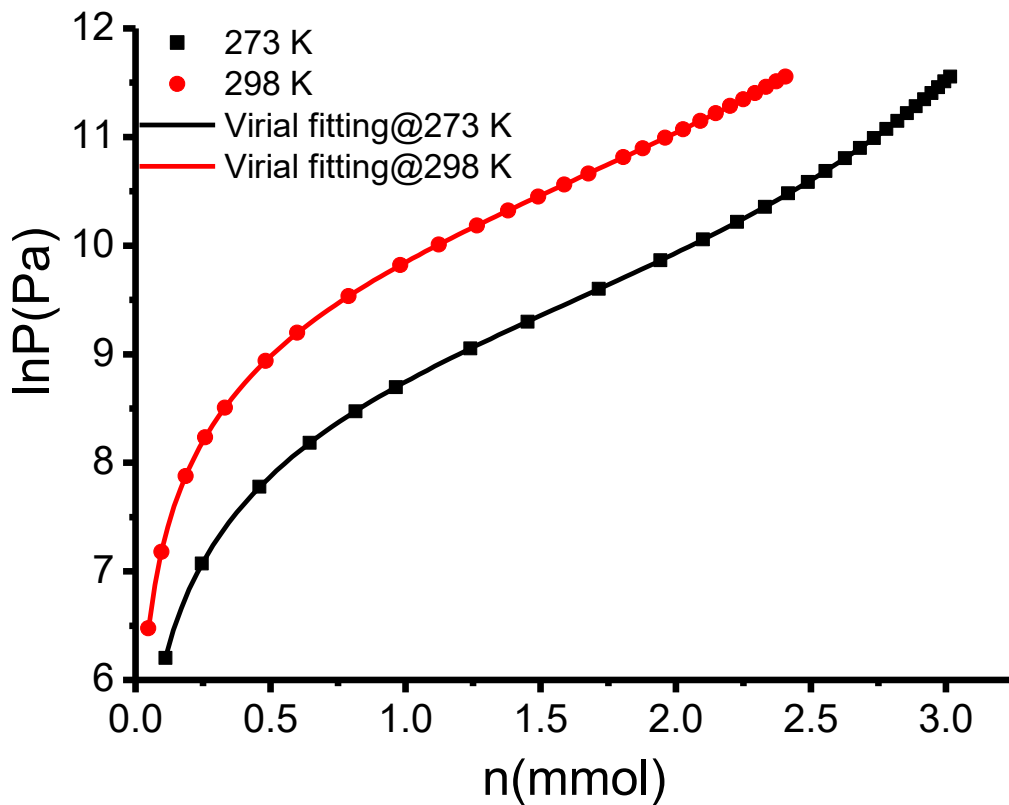

Figure S25. The virial fitting of CO<sub>2</sub> sorption data for MFM-305-CH<sub>3</sub>.

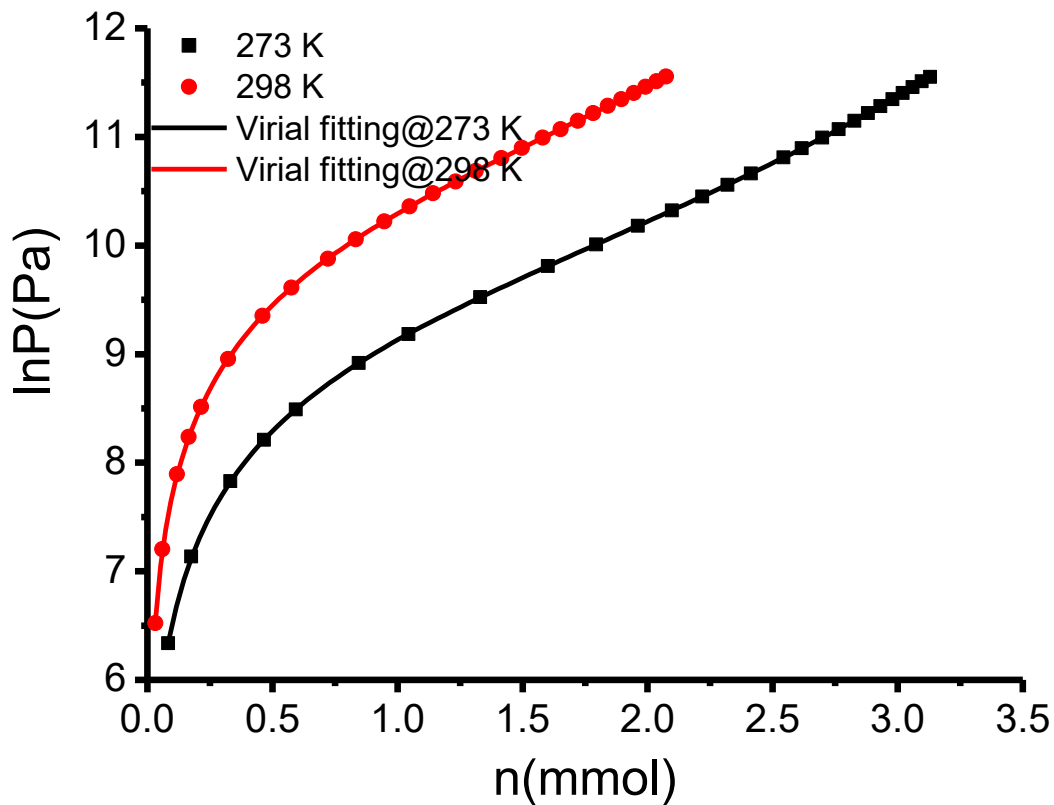

Figure S26. The virial fitting of CO<sub>2</sub> sorption data for MFM-305.

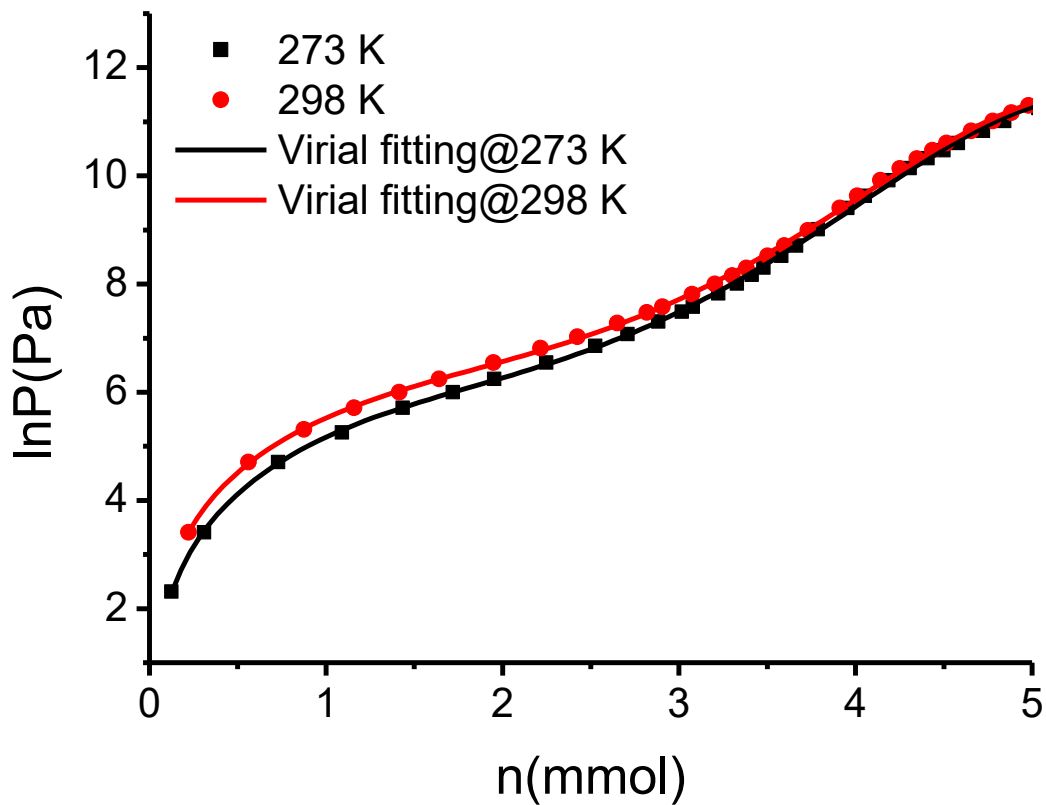

Figure S27. The virial fitting of  $\text{SO}_2$  sorption data for MFM-305- $\text{CH}_3$ .

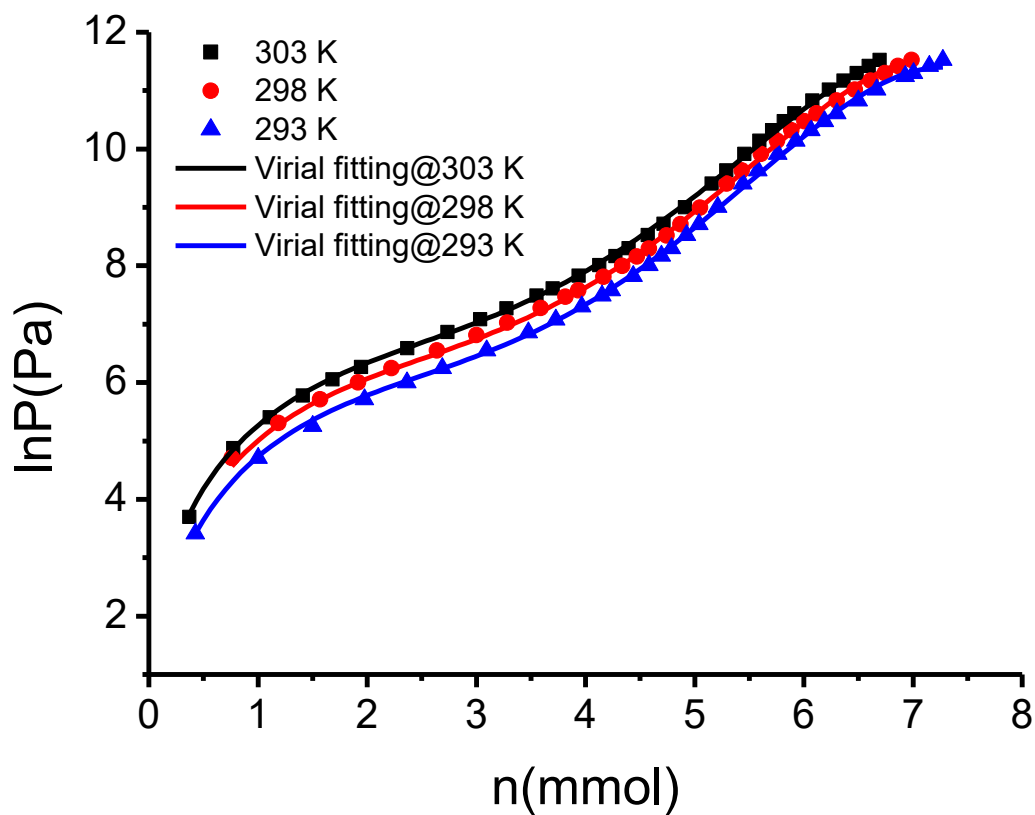

Figure S28. The virial fitting of  $\text{SO}_2$  sorption data for MFM-305.

**Table S2.** The adsorption capacities of SO<sub>2</sub> in various porous materials at 1bar and 298 K.

|                         | Surface area<br>/m <sup>2</sup> g <sup>-1</sup> | Pore volume<br>cm <sup>3</sup> g <sup>-1</sup> | SO <sub>2</sub> uptake<br>/mmol g <sup>-1</sup> | SO <sub>2</sub> packing<br>density/<br>g cm <sup>-3</sup> | refs      |
|-------------------------|-------------------------------------------------|------------------------------------------------|-------------------------------------------------|-----------------------------------------------------------|-----------|
| MFM-305-CH <sub>3</sub> | 256                                             | 0.181                                          | 5.16                                            | 1.825                                                     | This work |
| FMOF-2                  | 378                                             | 0.217                                          | 2.19                                            | 0.647                                                     | 9         |
| SIFSIX-3-Zn             | 250                                             | 0.188                                          | 1.89                                            | 0.644                                                     | 10        |
| SIFSIX-3-Ni             | 368                                             | 0.191                                          | 2.74                                            | 0.919                                                     | 10        |
| Mg-MOF-74               | 1525                                            | 0.62                                           | 8.6                                             | 0.888                                                     | 11        |
| MFM-305                 | 779                                             | 0.372                                          | 6.99                                            | 1.199                                                     | This work |
| ZnCo                    | 700                                             | 0.356                                          | 1.8                                             | 0.3249                                                    | 12        |
| CoCo                    | 712                                             | 0.658                                          | 2.5                                             | 0.243                                                     | 12        |
| SIFSIX-2-Cu-i           | 735                                             | 0.26                                           | 6.9                                             | 1.700                                                     | 10        |
| MFM-300(Al)             | 1037                                            | 0.375                                          | 7.1                                             | 1.213                                                     | 13        |
| MFM-300(In)             | 1071                                            | 0.419                                          | 8.28                                            | 1.266                                                     | 14        |
| SIFSIX-1-Cu             | 1337                                            | 0.683                                          | 11.01                                           | 1.033                                                     | 10        |
| IRMOF-3                 | 1568                                            | 1.07                                           | 6                                               | 0.359                                                     | 11        |
| Ni(bdc)(ted)0.5         | 1783                                            | 0.665                                          | 9.97                                            | 0.961                                                     | 15        |
| Zn(bdc)(ted)0.5         | 1888                                            | 0.65                                           | 4.41                                            | 0.435                                                     | 15        |
| MOF-5                   | 2205                                            | 1.216                                          | 1                                               | 0.053                                                     | 11        |
| MFM-202a                | 2220                                            | 0.953                                          | 10.2                                            | 0.686                                                     | 16        |
| SIFSIX-2-Cu             | 3140                                            | 1.15                                           | 6.5                                             | 0.362                                                     | 10        |

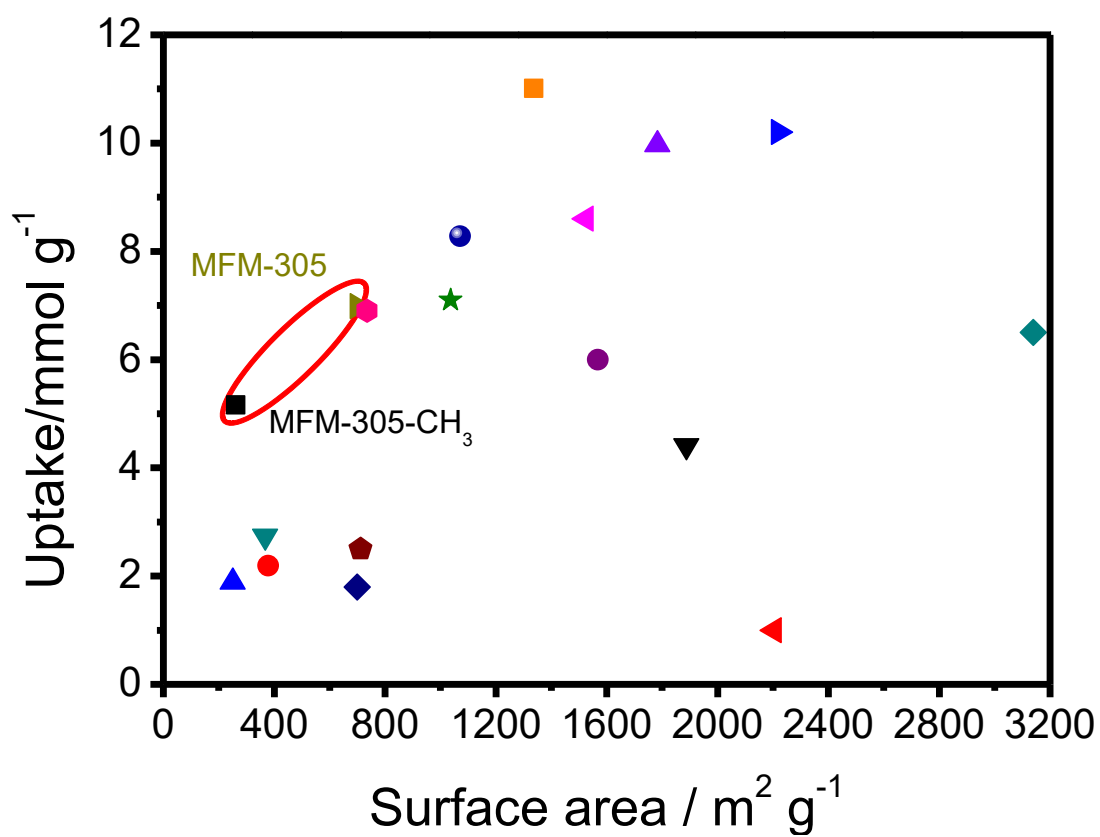

**Figure S29.** Comparison of the SO<sub>2</sub> uptake in reported MOFs (1 bar, 298K) with respect to surface area.



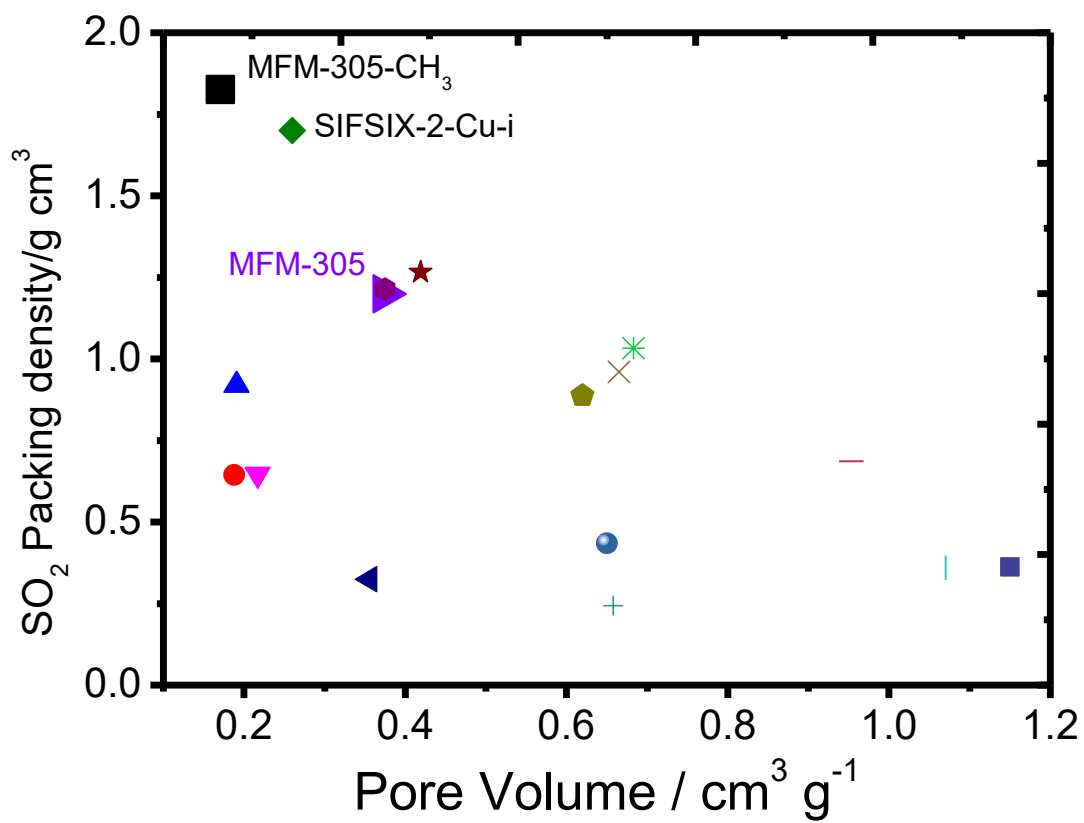

**Figure S30.** Comparison of the SO<sub>2</sub> packing density in reported MOFs (1 bar, 298K) with respect to pore volume.

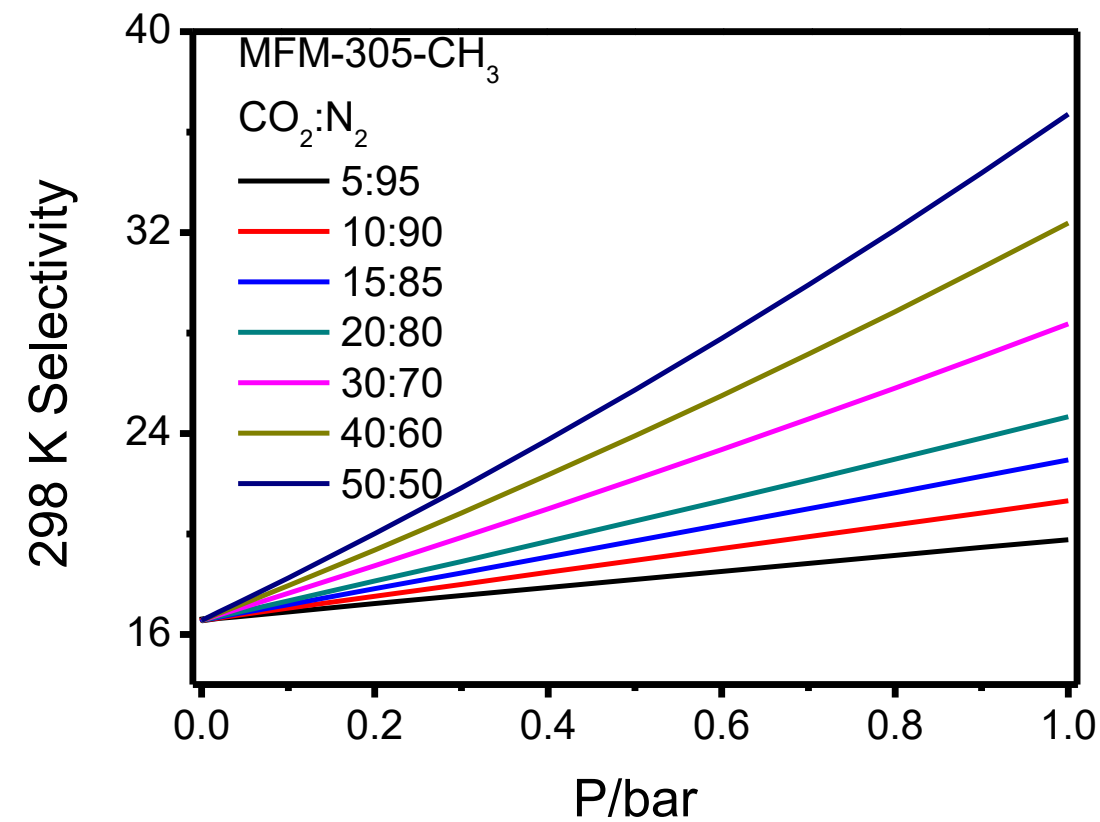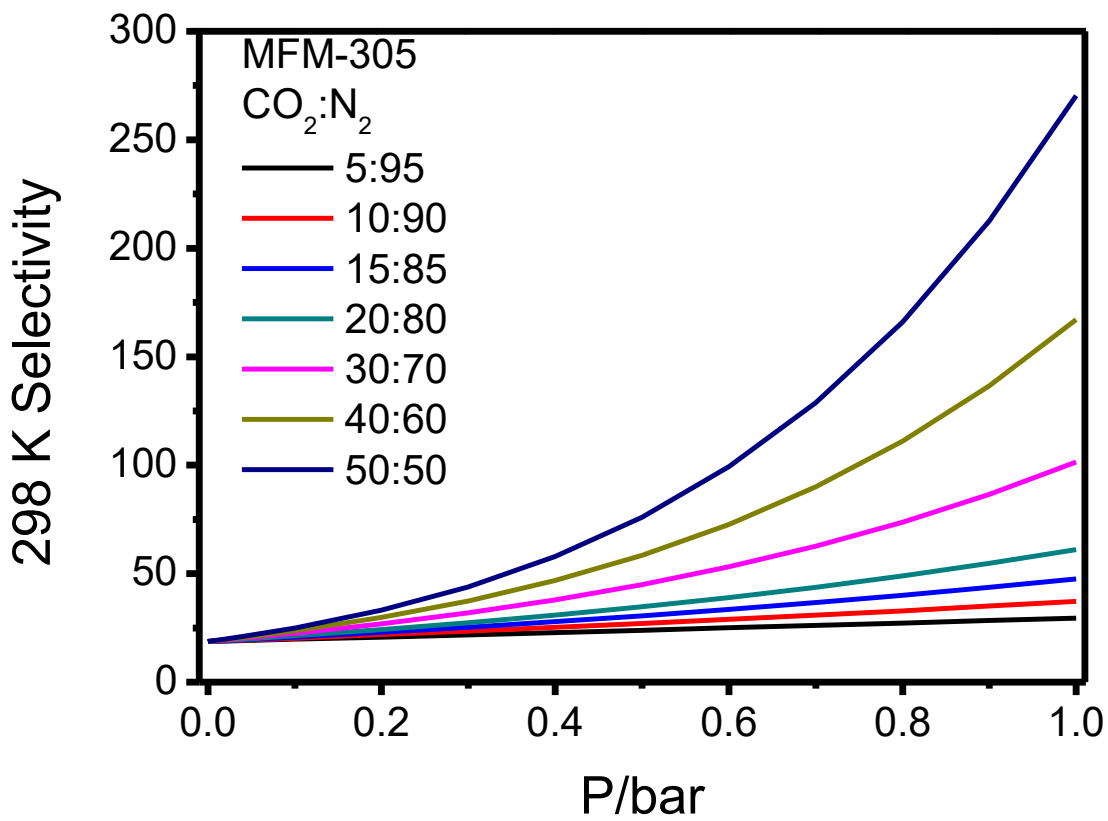

**Figure S31.** IAST selectivity for CO<sub>2</sub>/N<sub>2</sub> mixtures in MFM-305-CH<sub>3</sub> (top) and MFM-305 (bottom) up to a pressure of 1 bar at 298 K.

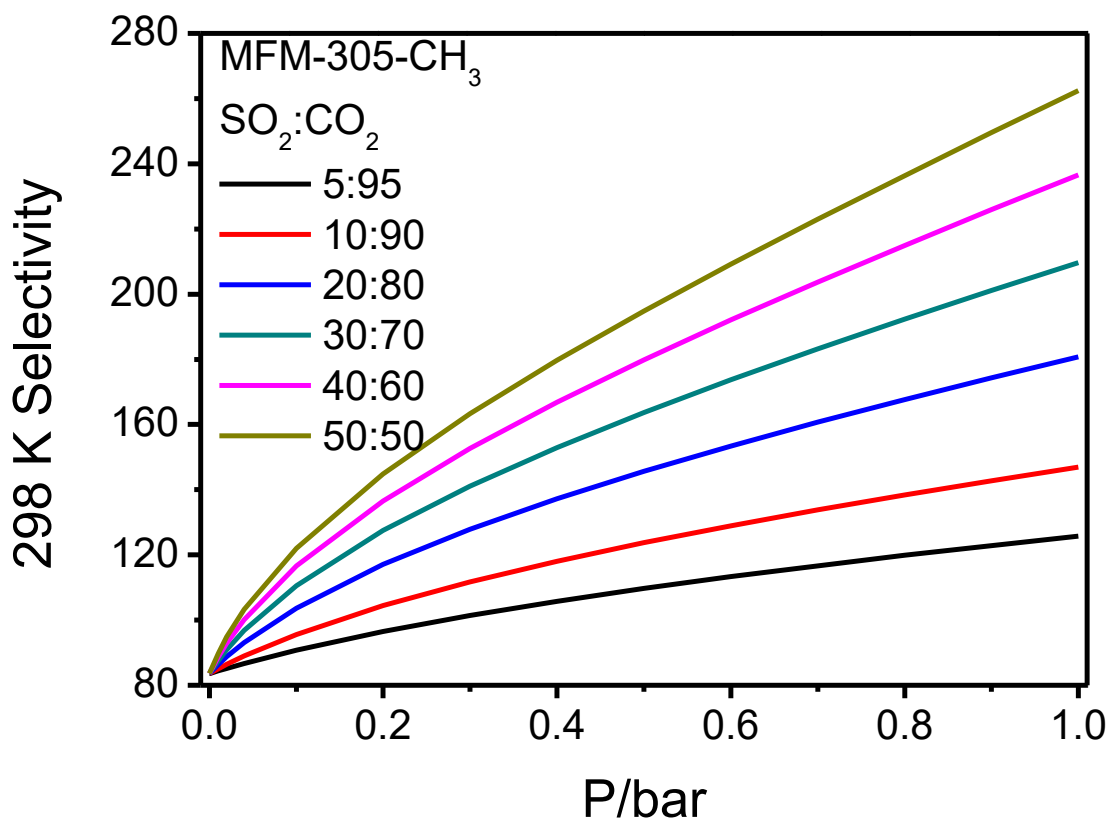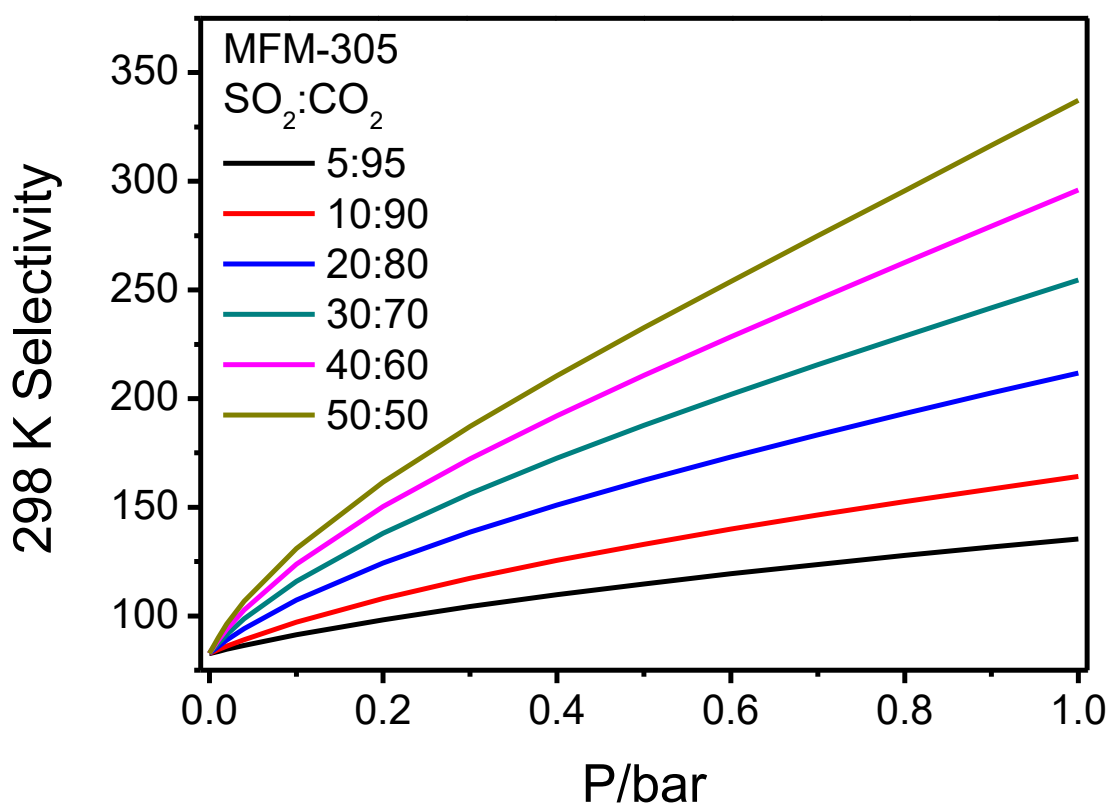

**Figure S32.** IAST selectivity for SO<sub>2</sub>/CO<sub>2</sub> mixtures in MFM-305-CH<sub>3</sub> (up) and MFM-305 (bottom) up to a pressure of 1 bar at 298 K.

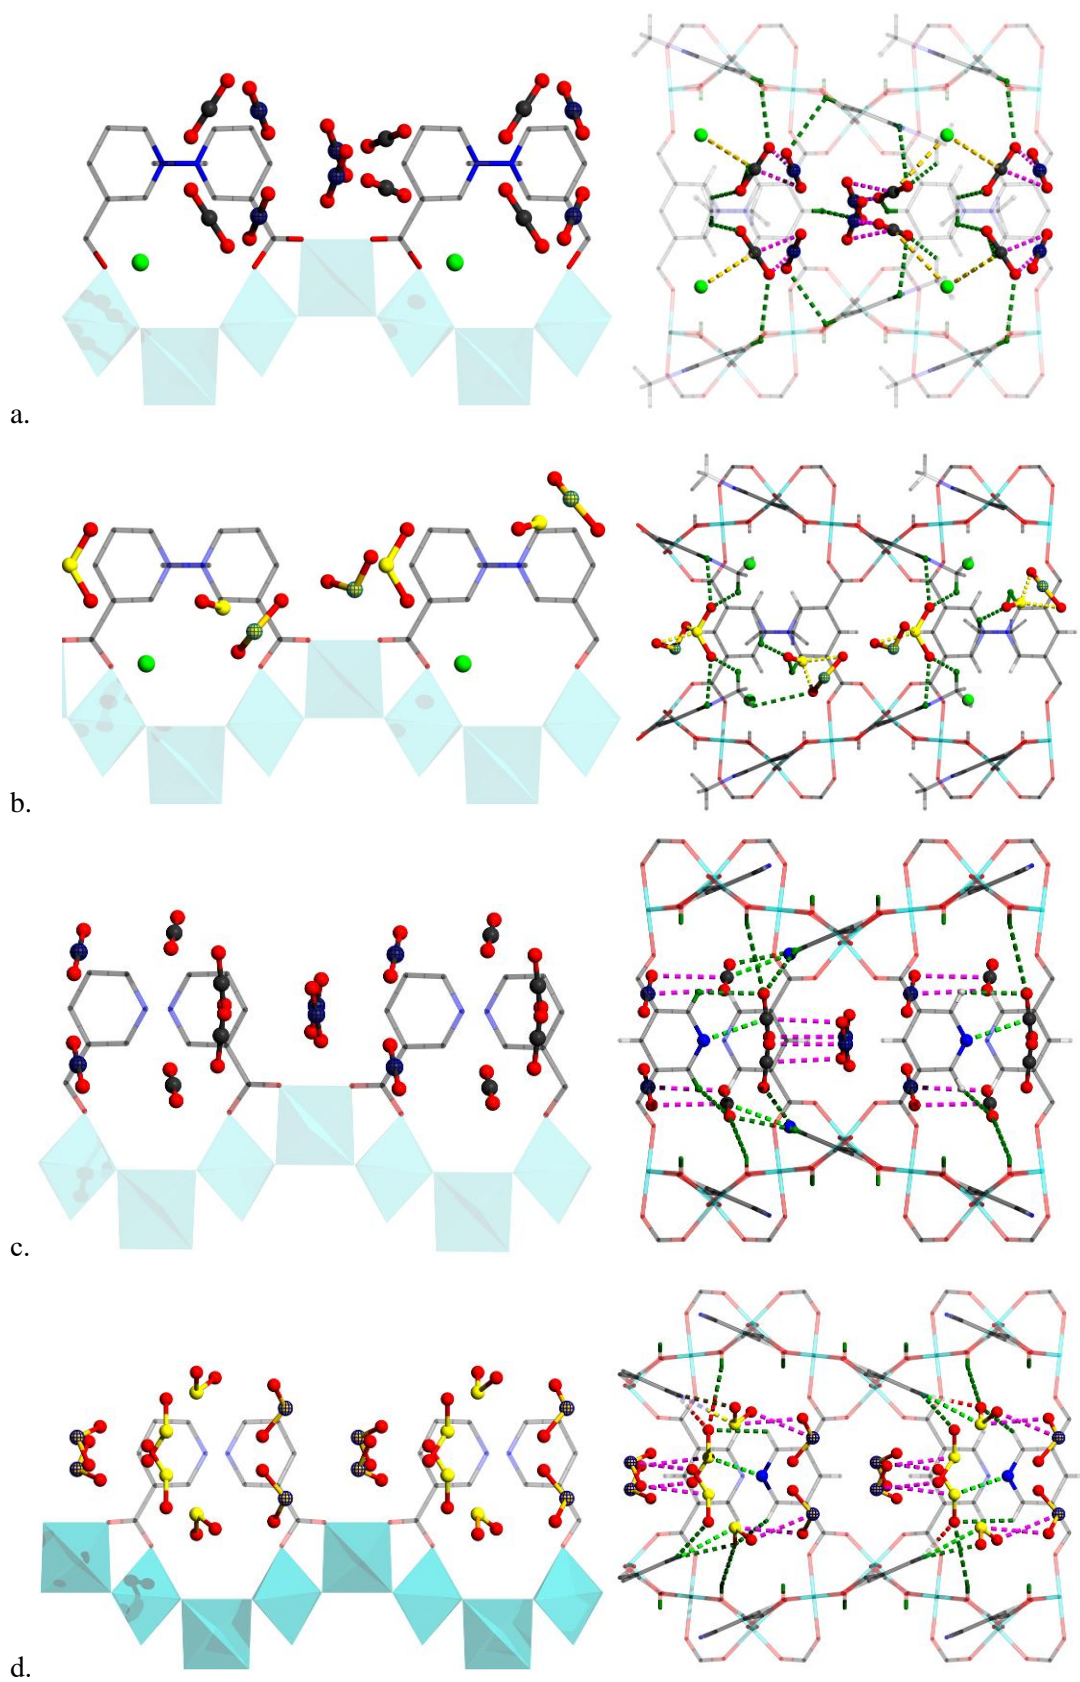

**Figure S33.** Views of the packing and interaction of adsorbed CO<sub>2</sub> within (a) MFM-305-CH<sub>3</sub> and (c) MFM-305, and of adsorbed SO<sub>2</sub> within (b) MFM-305-CH<sub>3</sub> and (d) MFM-305.

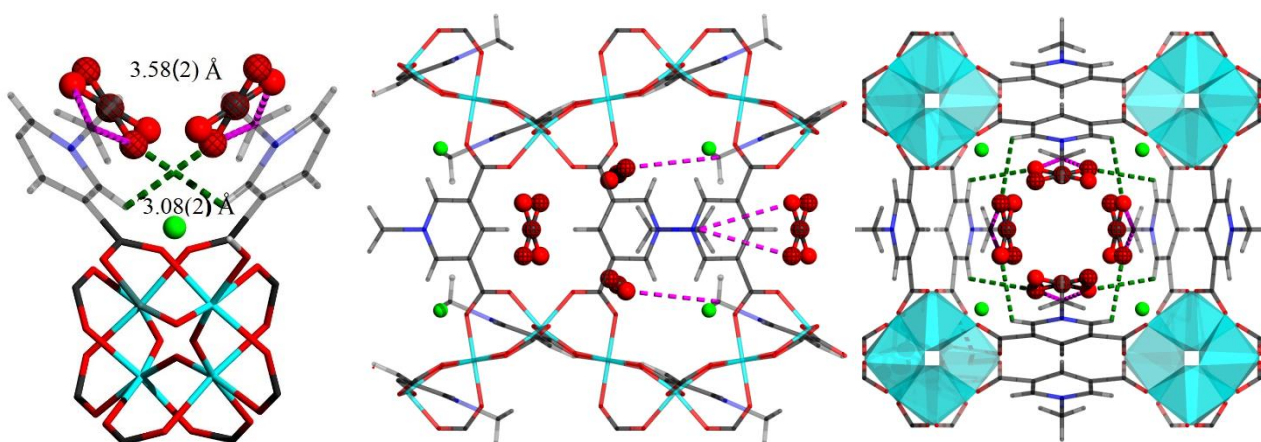

**Figure S34.** Views of the packing and interaction of adsorbed CO<sub>2</sub> within MFM-305-CH<sub>3</sub> at 7K.

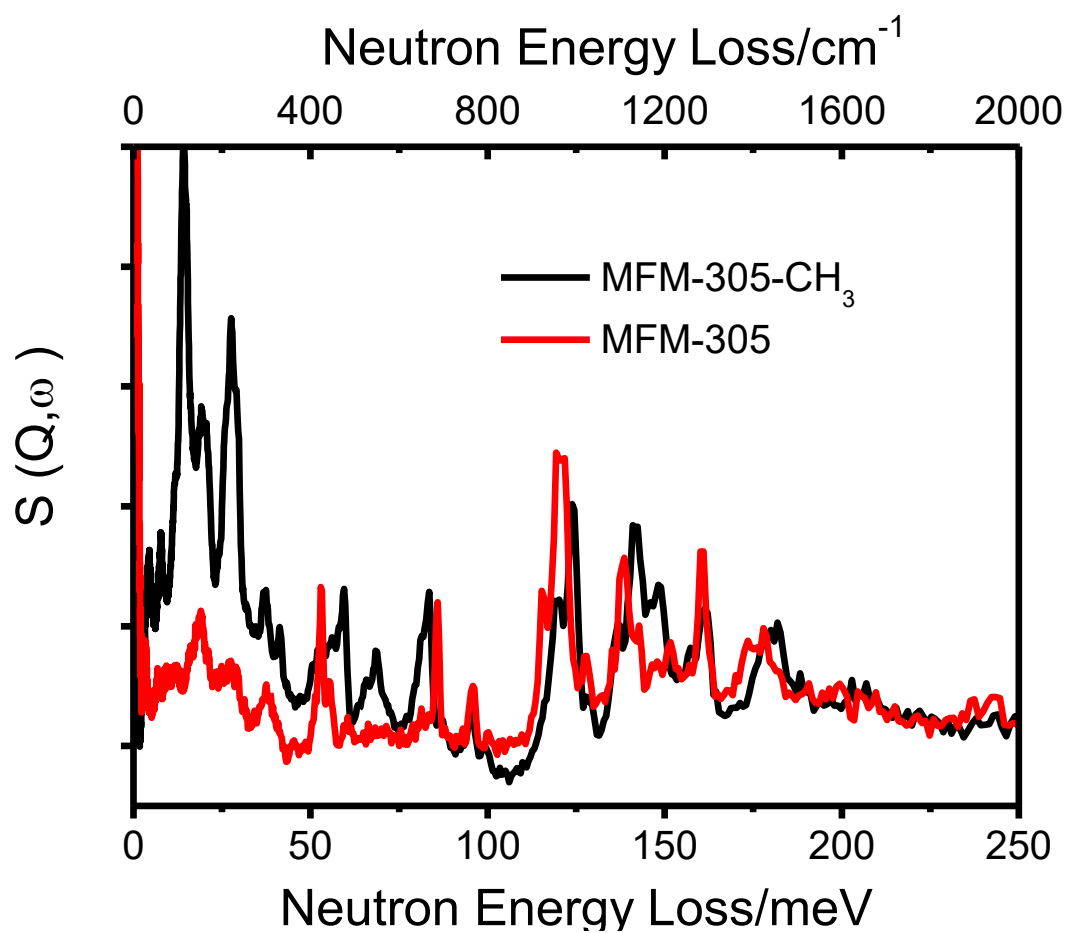

**Figure S35.** Comparison of the experimental INS spectra for MFM-305-CH<sub>3</sub> and MFM-305.

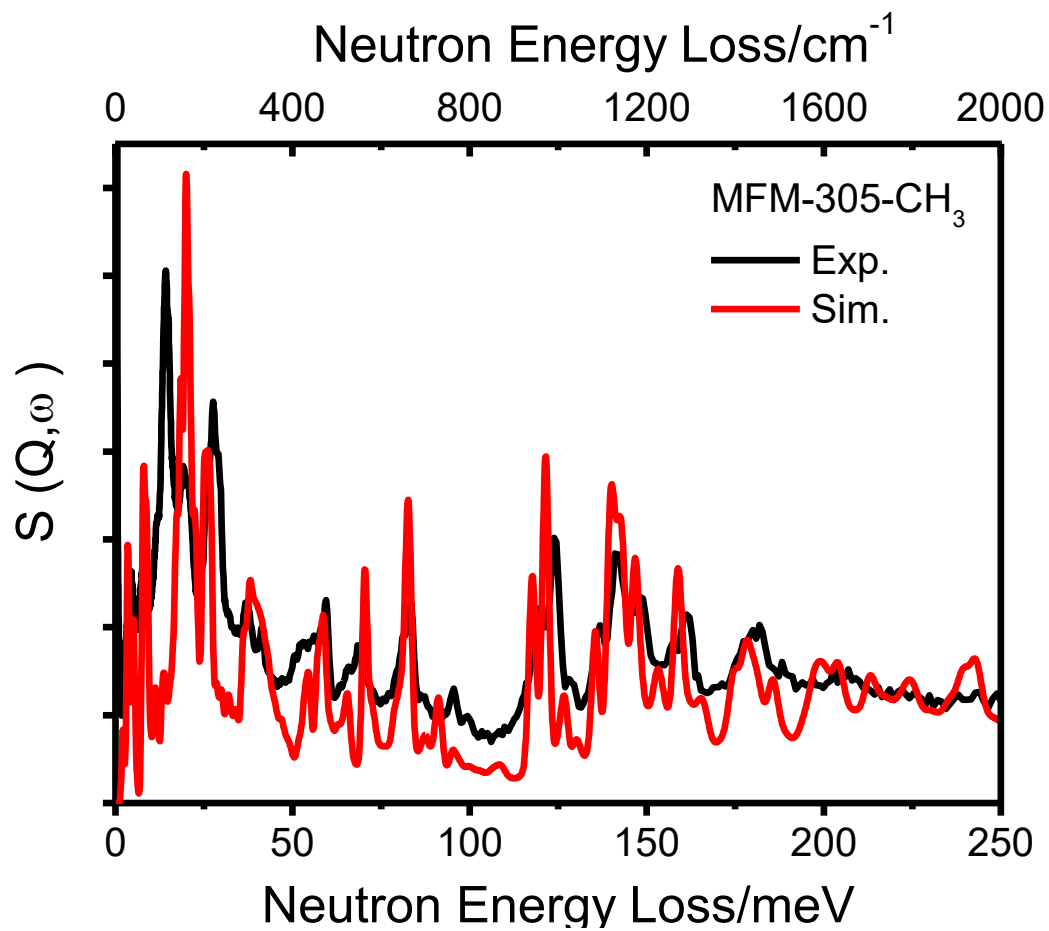

**Figure S36.** Comparison of the experimental and simulated INS spectra for MFM-305-CH<sub>3</sub>.

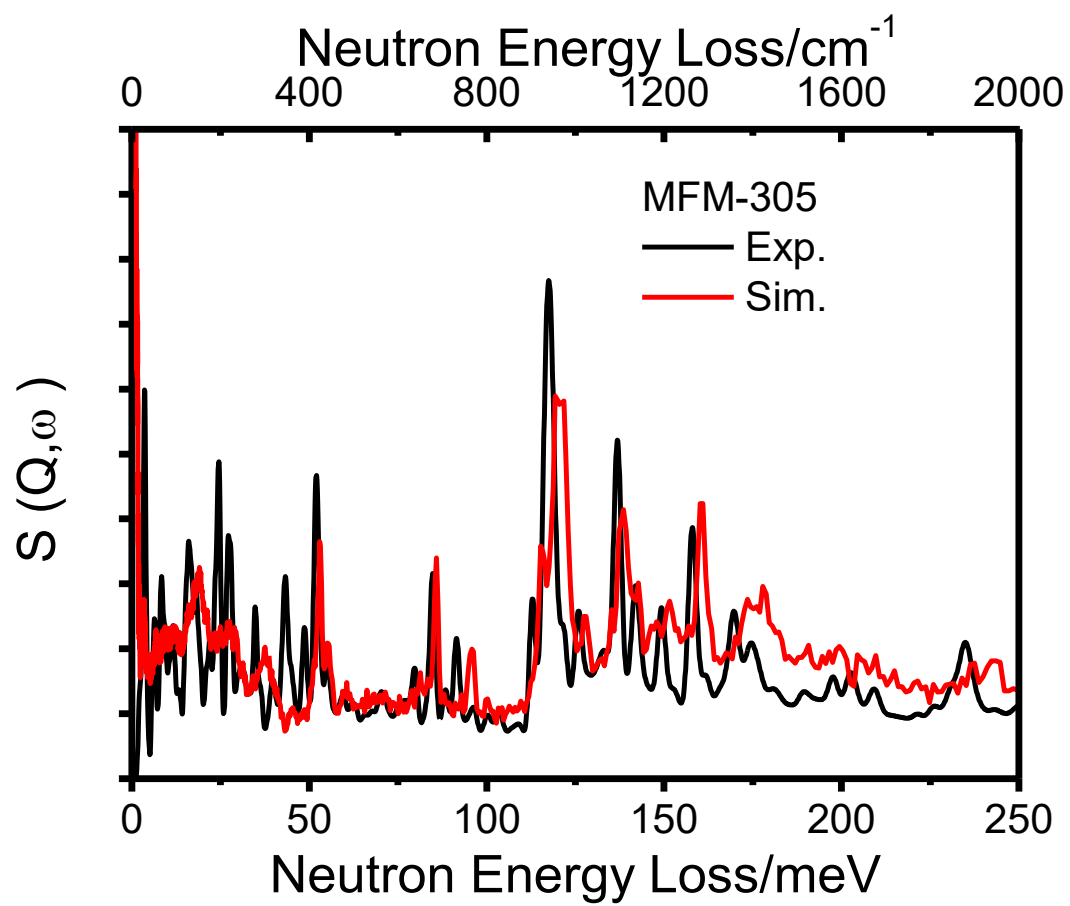

**Figure S37.** Comparison of the experimental and simulated INS spectra for MFM-305.

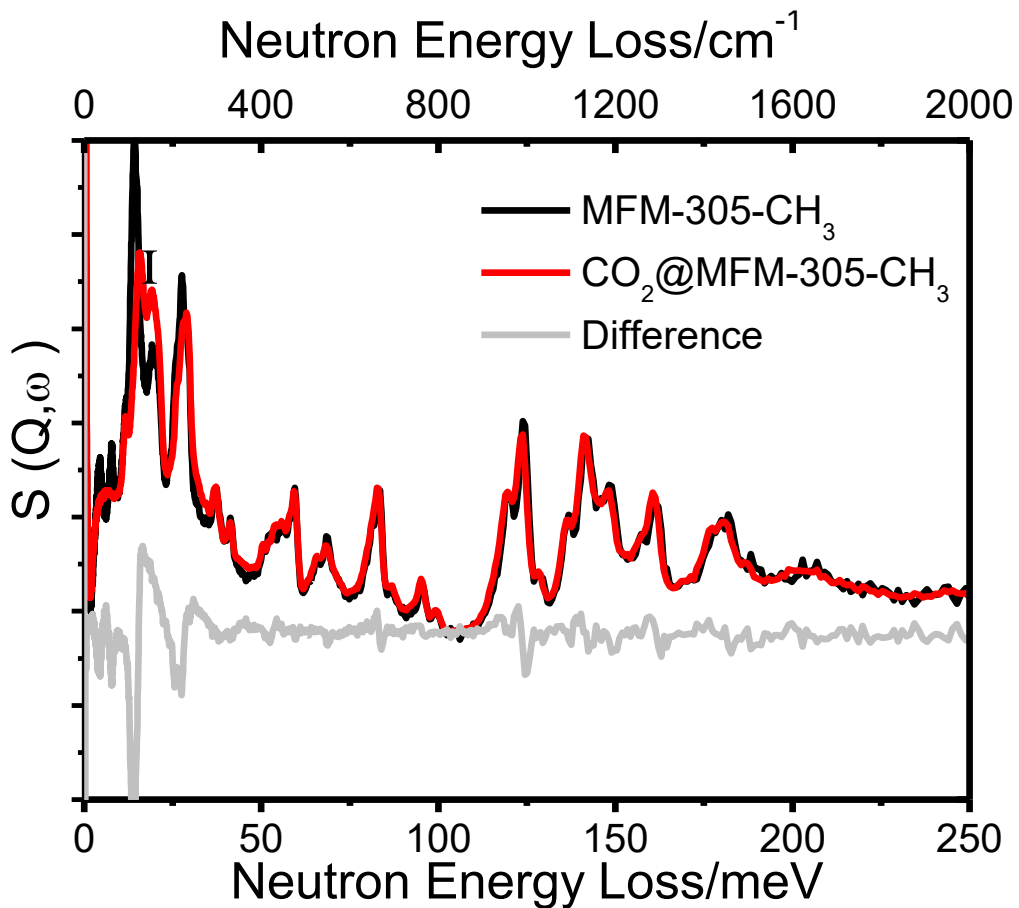

**Figure S38.** Comparison of the experimental INS spectra for bare and  $\text{CO}_2$ -loaded MFM-305- $\text{CH}_3$ .



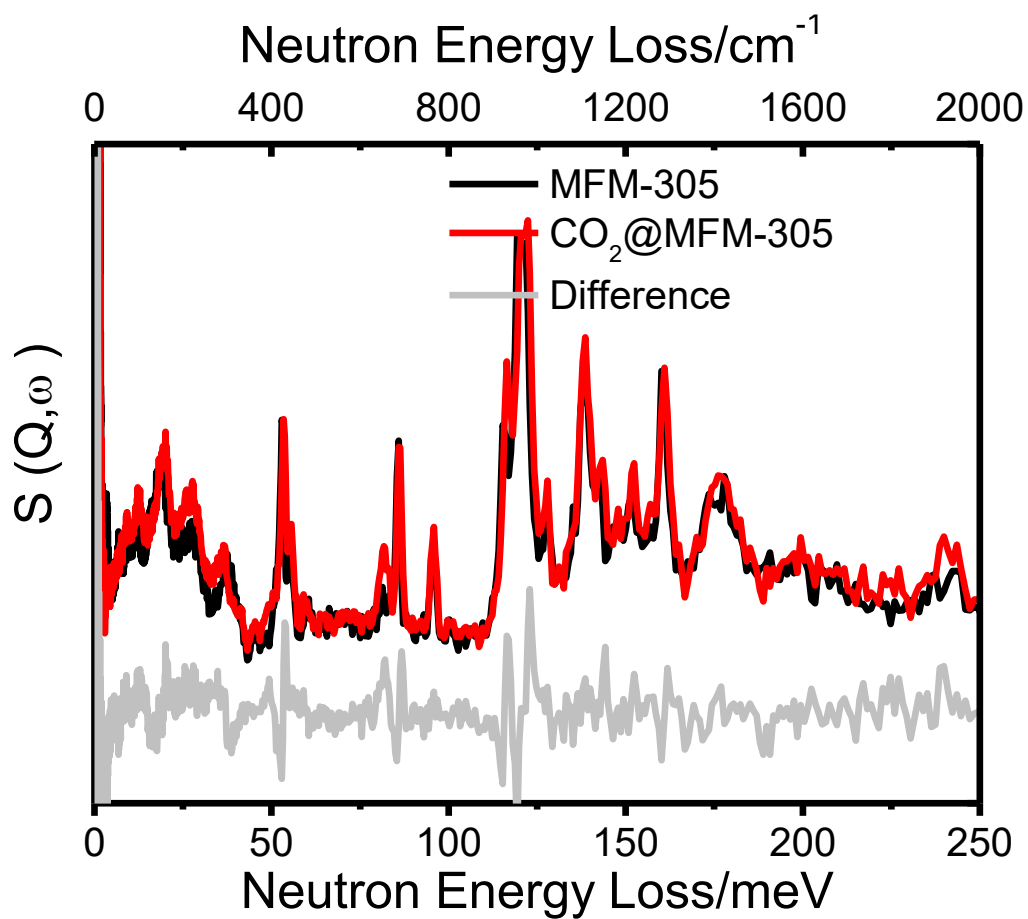

**Figure S39.** Comparison of the experimental INS spectra for bare and CO<sub>2</sub>-loaded MFM-305.

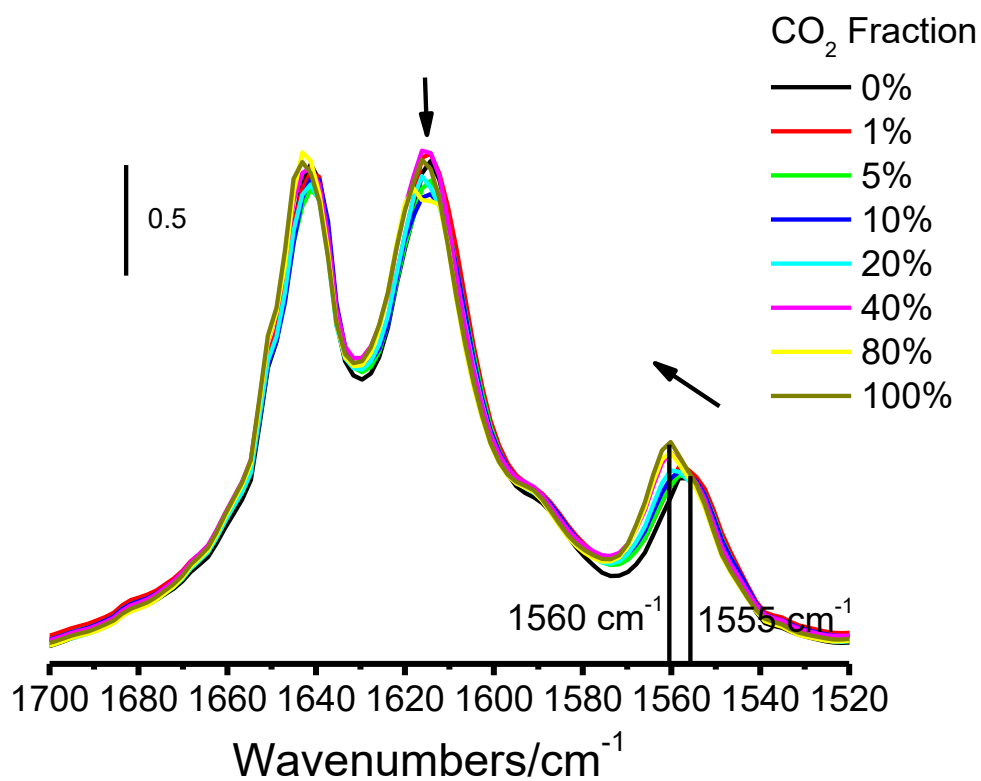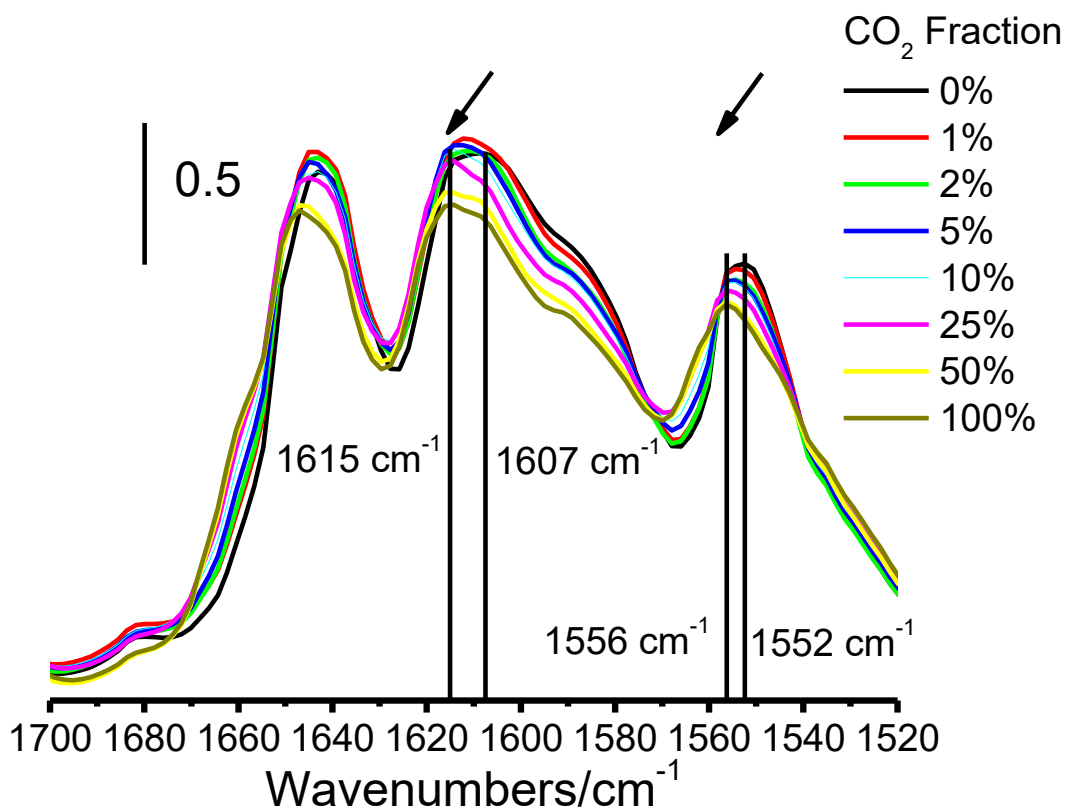

**Figure S40.** DRIFTS spectra of CO<sub>2</sub>-loaded MFM-305-CH<sub>3</sub> (top) and MFM-305 (bottom) recorded from 0% to 100% (1 bar).

**Table S3.** Summary of Crystal Structure Data

| <b>MFM-305-CH<sub>3</sub></b> |                                                          | 273K                                                                         | 230K                                                                         | 198K                                                                         | 150K                                                                         | 117K                                                                         | 7K                                                                           | SO <sub>2</sub>                                                              |
|-------------------------------|----------------------------------------------------------|------------------------------------------------------------------------------|------------------------------------------------------------------------------|------------------------------------------------------------------------------|------------------------------------------------------------------------------|------------------------------------------------------------------------------|------------------------------------------------------------------------------|------------------------------------------------------------------------------|
| Formula                       | Al(OH)(C <sub>8</sub> H <sub>6</sub> NO <sub>4</sub> )Cl | Al(OH)(C <sub>8</sub> H <sub>6</sub> NO <sub>4</sub> )Cl·0.60CO <sub>2</sub> | Al(OH)(C <sub>8</sub> H <sub>6</sub> NO <sub>4</sub> )Cl·0.70CO <sub>2</sub> | Al(OH)(C <sub>8</sub> H <sub>6</sub> NO <sub>4</sub> )Cl·0.72CO <sub>2</sub> | Al(OH)(C <sub>8</sub> H <sub>6</sub> NO <sub>4</sub> )Cl·0.71CO <sub>2</sub> | Al(OH)(C <sub>8</sub> H <sub>6</sub> NO <sub>4</sub> )Cl·0.67CO <sub>2</sub> | Al(OH)(C <sub>8</sub> H <sub>6</sub> NO <sub>4</sub> )Cl·0.71CO <sub>2</sub> | Al(OH)(C <sub>8</sub> H <sub>6</sub> NO <sub>4</sub> )Cl·0.77SO <sub>2</sub> |
| Crystal system                | Tetragonal                                               | Tetragonal                                                                   | Tetragonal                                                                   | Tetragonal                                                                   | Tetragonal                                                                   | Tetragonal                                                                   | Tetragonal                                                                   | Tetragonal                                                                   |
| Space group                   | I4 <sub>1</sub> /amd                                     | I4 <sub>1</sub> /amd                                                         | I4 <sub>1</sub> /amd                                                         | I4 <sub>1</sub> /amd                                                         | I4 <sub>1</sub> /amd                                                         | I4 <sub>1</sub> /amd                                                         | I4 <sub>1</sub> /amd                                                         | I4 <sub>1</sub> /amd                                                         |
| <i>a, b</i> / Å               | 21.48(6)                                                 | 21.4749(1)                                                                   | 21.4715(1)                                                                   | 21.4703(1)                                                                   | 21.4630(1)                                                                   | 21.4577(1)                                                                   | 21.48(6)                                                                     | 21.4987(1)                                                                   |
| <i>c</i> / Å                  | 10.90(3)                                                 | 10.9000(1)                                                                   | 10.8861(1)                                                                   | 10.8751(1)                                                                   | 10.8553(1)                                                                   | 10.8407(1)                                                                   | 10.88(3)                                                                     | 10.8528(1)                                                                   |
| <i>V</i> / Å <sup>3</sup>     | 5030(30)                                                 | 5026.8(1)                                                                    | 5018.8(1)                                                                    | 5013.1(1)                                                                    | 5000.6 (1)                                                                   | 4991.4(1)                                                                    | 5020(40)                                                                     | 5016.1(1)                                                                    |
| <i>Z</i>                      | 8                                                        | 8                                                                            | 8                                                                            | 8                                                                            | 8                                                                            | 8                                                                            | 8                                                                            | 8                                                                            |
| Sample size (mm)              | Cylinder, 20 × 0.7                                       |                                                                              |                                                                              |                                                                              |                                                                              |                                                                              | Cylinder, 65 x 8                                                             | Cylinder, 20 × 0.7                                                           |
| Radiation type                | Synchrotron X-Ray λ = 0.825250                           |                                                                              |                                                                              |                                                                              |                                                                              |                                                                              | Neutron                                                                      | Synchrotron X-Ray λ = 0.825250                                               |
| Scan method                   | Continuous scan                                          |                                                                              |                                                                              |                                                                              |                                                                              |                                                                              | Time of Flight                                                               | Continuous scan                                                              |
| R <sub>exp</sub>              | 3.18                                                     | 3.74                                                                         | 3.74                                                                         | 3.72                                                                         | 3.68                                                                         | 3.64                                                                         | 0.19                                                                         | 1.94                                                                         |
| Rwp/%                         | 6.09                                                     | 6.07                                                                         | 6.27                                                                         | 6.29                                                                         | 6.26                                                                         | 6.14                                                                         | 1.13                                                                         | 5.64                                                                         |
| Rp/%                          | 4.76                                                     | 3.74                                                                         | 3.74                                                                         | 3.72                                                                         | 4.91                                                                         | 4.77                                                                         | 0.94                                                                         | 4.36                                                                         |
| GOOF                          | 1.91                                                     | 1.62                                                                         | 1.68                                                                         | 1.69                                                                         | 1.70                                                                         | 1.68                                                                         | 5.96                                                                         | 1.40                                                                         |
| CCDC                          | 1580831                                                  | 1580823                                                                      | 1580822                                                                      | 1580821                                                                      | 1580820                                                                      | 1580819                                                                      | 1580818                                                                      | 1580833                                                                      |
|                               |                                                          |                                                                              |                                                                              |                                                                              |                                                                              |                                                                              |                                                                              |                                                                              |
| <b>MFM-305</b>                |                                                          | 270K                                                                         | 230K                                                                         | 198K                                                                         | 150K                                                                         | 100K                                                                         |                                                                              | SO <sub>2</sub>                                                              |
| Formula                       | Al(OH)(C <sub>7</sub> H <sub>3</sub> NO <sub>4</sub> )   | Al(OH)(C <sub>7</sub> H <sub>3</sub> NO <sub>4</sub> )·0.50CO <sub>2</sub>   | Al(OH)(C <sub>7</sub> H <sub>3</sub> NO <sub>4</sub> )·0.75CO <sub>2</sub>   | Al(OH)(C <sub>7</sub> H <sub>3</sub> NO <sub>4</sub> )·0.92CO <sub>2</sub>   | Al(OH)(C <sub>7</sub> H <sub>3</sub> NO <sub>4</sub> )·0.92CO <sub>2</sub>   | Al(OH)(C <sub>7</sub> H <sub>3</sub> NO <sub>4</sub> )·0.88CO <sub>2</sub>   |                                                                              | Al(OH)(C <sub>7</sub> H <sub>3</sub> NO <sub>4</sub> )·0.75SO <sub>2</sub>   |
| Crystal system                | Tetragonal                                               | Tetragonal                                                                   | Tetragonal                                                                   | Tetragonal                                                                   | Tetragonal                                                                   | Tetragonal                                                                   |                                                                              | Tetragonal                                                                   |
| Space group                   | I4 <sub>1</sub> /amd                                     | I4 <sub>1</sub> /amd                                                         | I4 <sub>1</sub> /amd                                                         | I4 <sub>1</sub> /amd                                                         | I4 <sub>1</sub> /amd                                                         | I4 <sub>1</sub> /amd                                                         |                                                                              | I4 <sub>1</sub> /amd                                                         |
| <i>a, b</i> / Å               | 21.4952(3)                                               | 21.4813(2)                                                                   | 21.4612(2)                                                                   | 21.4541(2)                                                                   | 21.4452(2)                                                                   | 21.4765(2)                                                                   |                                                                              | 21.4658(2)                                                                   |
| <i>c</i> / Å                  | 10.4572(2)                                               | 10.6140(2)                                                                   | 10.7306(2)                                                                   | 10.7853(2)                                                                   | 10.7670 (1)                                                                  | 10.7477(2)                                                                   |                                                                              | 10.7571(2)                                                                   |
| <i>V</i> / Å <sup>3</sup>     | 4831.6(1)                                                | 4897.8(1)                                                                    | 4942.3(1)                                                                    | 4964.2(1)                                                                    | 4951.7(1)                                                                    | 4957.3(1)                                                                    |                                                                              | 4956.7(1)                                                                    |
| <i>Z</i>                      | 8                                                        | 8                                                                            | 8                                                                            | 8                                                                            | 8                                                                            | 8                                                                            |                                                                              | 8                                                                            |
| Sample size (mm)              | Cylinder, 20 × 0.7                                       |                                                                              |                                                                              |                                                                              |                                                                              |                                                                              |                                                                              | Cylinder, 20 × 0.7                                                           |
| Radiation type                | Synchrotron X-Ray λ = 0.825250                           |                                                                              |                                                                              |                                                                              |                                                                              |                                                                              |                                                                              | Synchrotron X-Ray λ = 0.825250                                               |
| Scan method                   | Continuous scan                                          |                                                                              |                                                                              |                                                                              |                                                                              |                                                                              |                                                                              | Continuous scan                                                              |
| R <sub>exp</sub>              | 3.68                                                     | 3.41                                                                         | 3.42                                                                         | 3.41                                                                         | 3.40                                                                         | 3.39                                                                         |                                                                              | 3.38                                                                         |
| Rwp                           | 5.95                                                     | 5.75                                                                         | 6.15                                                                         | 5.92                                                                         | 5.62                                                                         | 6.04                                                                         |                                                                              | 5.95                                                                         |
| Rp                            | 4.63                                                     | 4.39                                                                         | 4.64                                                                         | 4.50                                                                         | 4.30                                                                         | 4.61                                                                         |                                                                              | 4.53                                                                         |
| GOOF                          | 1.61                                                     | 1.69                                                                         | 1.80                                                                         | 1.74                                                                         | 1.78                                                                         | 1.78                                                                         |                                                                              | 1.76                                                                         |
| CCDC                          | 1580832                                                  | 1580829                                                                      | 1580828                                                                      | 1580827                                                                      | 1580826                                                                      | 1580825                                                                      |                                                                              | 1580834                                                                      |

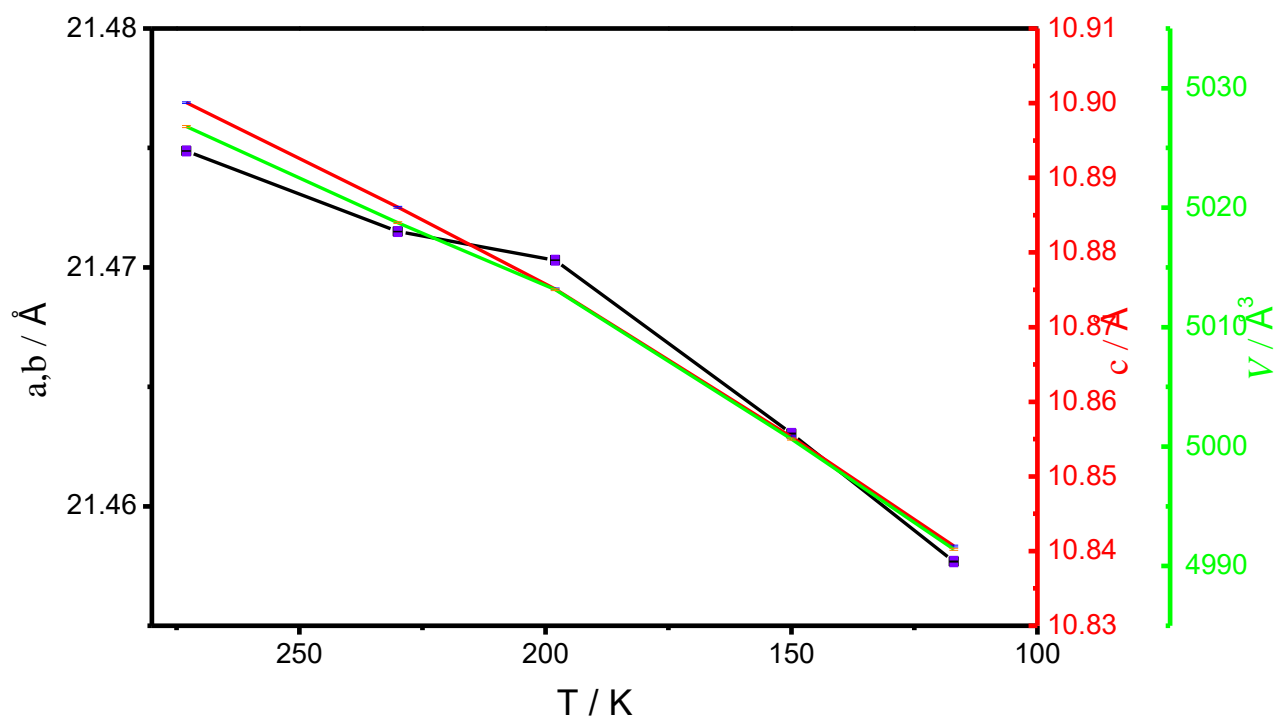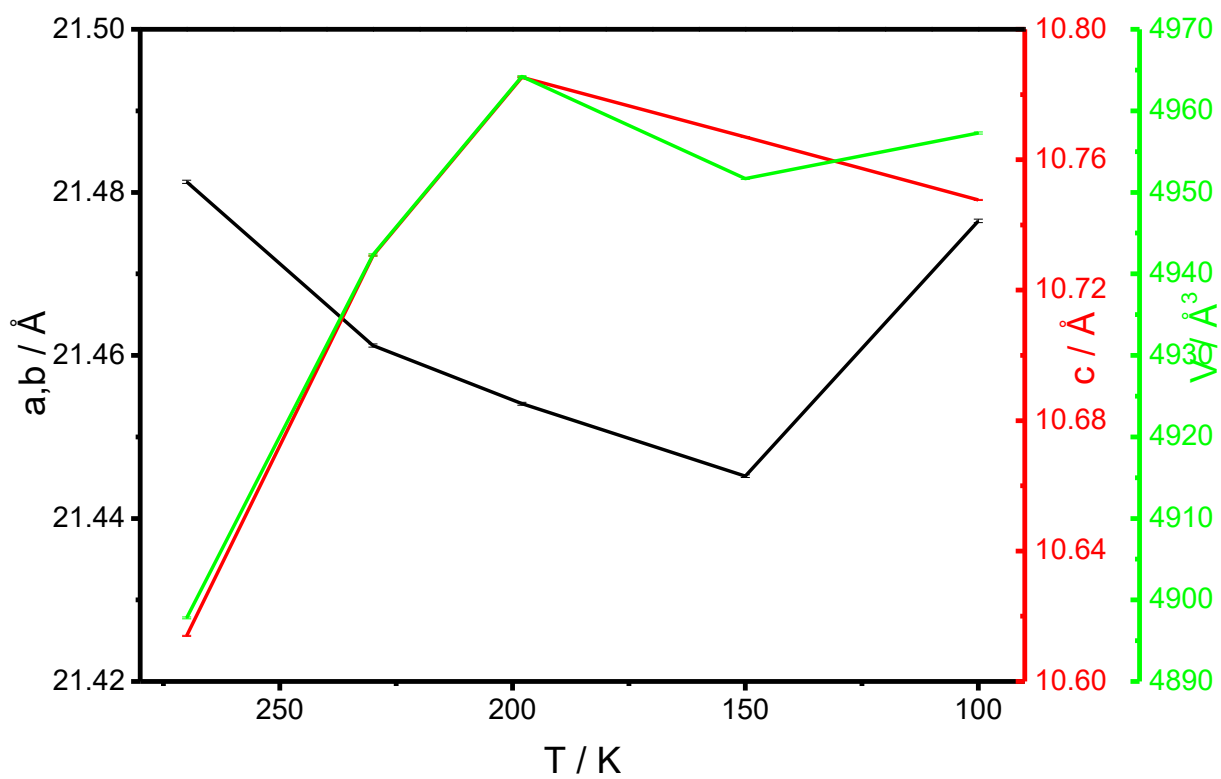

**Figure S41.** Cell parameters for CO<sub>2</sub>-loaded MFM-305-CH<sub>3</sub> (top) and MFM-305 (bottom) at different temperature.

**Table S4.** Bond lengths of MFM-305-CH<sub>3</sub> and MFM-305.

|                                                           | CO <sub>2</sub> |         |         |         |         |         |                                                           | SO <sub>2</sub> |
|-----------------------------------------------------------|-----------------|---------|---------|---------|---------|---------|-----------------------------------------------------------|-----------------|
|                                                           | 273 K           | 230 K   | 198 K   | 150 K   | 117 K   | 7 K     |                                                           |                 |
| MFM-305-CH <sub>3</sub>                                   |                 |         |         |         |         |         | MFM-305-CH <sub>3</sub>                                   | 298 K           |
| $\text{OCO}^{\text{I}}\text{-H}_3\text{C}/\text{\AA}$     | 3.10(2)         | 2.51(1) | 2.54(1) | 2.47(2) | 2.38(2) | 3.58(2) | $\text{OSO}^{\text{I}}\text{-H}_3\text{C}/\text{\AA}$     | 2.49(3)         |
| $\text{OCO}^{\text{I}}\text{-Cl}/\text{\AA}$              | 4.63(1)         | 3.83(1) | 3.78(1) | 3.74(1) | 3.77(1) |         | $\text{OSO}^{\text{II}}\text{-H}_3\text{C}/\text{\AA}$    | 3.73(2)         |
| $\text{OCO}^{\text{I}}\text{-H}_2\text{C}/\text{\AA}$     | 3.00(2)         | 2.89(1) | 2.87(2) | 2.83(2) | 2.78(2) | 3.08(2) | $\text{OSO}^{\text{I}}\text{-H}_2\text{C}/\text{\AA}$     | 2.54(2)         |
| $\text{OCO}^{\text{II}}\text{-H}_1\text{C}/\text{\AA}$    | 4.02(2)         | 3.44(2) | 3.50(1) | 3.44(1) | 3.44(1) |         | $\text{OSO}^{\text{I}}\text{-OSO}^{\text{II}}/\text{\AA}$ | 3.97(3)         |
| $\text{OCO}^{\text{I}}\text{-OCO}^{\text{II}}/\text{\AA}$ | 3.74(2)         | 3.81(2) | 3.87(1) | 3.86(2) | 3.91(2) |         | $\text{OSO}^{\text{I}}\text{-OSO}^{\text{II}}/\text{\AA}$ | 3.38(2)         |
| $\text{OCO}^{\text{I}}\text{-OCO}^{\text{II}}/\text{\AA}$ | 3.81(2)         | 4.06(1) | 4.10(1) | 4.14(1) | 4.09(2) |         |                                                           |                 |
| MFM-305                                                   | 270 K           | 230 K   | 198 K   | 150 K   | 100 K   |         | MFM-305                                                   | 298 K           |
| $\text{OCO}^{\text{I}}\text{-HO}/\text{\AA}$              | 4.20(3)         | 3.66(4) | 3.45(3) | 3.44(3) | 3.34(4) |         | $\text{OSO}\text{-HO}/\text{\AA}$                         | 3.42(4)         |
| $\text{OCO}^{\text{I}}\text{-H}_2\text{C}/\text{\AA}$     | 3.18(1)         | 2.88(2) | 2.73(1) | 2.67(1) | 2.72(2) |         | $\text{N-OSO}^{\text{II}}/\text{\AA}$                     | 2.78(1)         |
|                                                           | 2.67(2)         | 2.42(2) | 2.44(1) | 2.48(1) | 2.38(2) |         | $\text{OSO}^{\text{I}}\text{-H}_2\text{C}/\text{\AA}$     | 2.63(3)         |
| $\text{N-OCO}^{\text{I}}/\text{\AA}$                      | 3.16(1)         | 2.97(1) | 2.89(1) | 2.86(0) | 2.96(1) |         | $\text{OSO}^{\text{II}}\text{-H}_2\text{C}/\text{\AA}$    | 3.14(3)         |
| $\text{OCO}^{\text{I}}\text{-OCO}^{\text{II}}/\text{\AA}$ | 5.03(2)         | 3.06(2) | 3.14(1) | 3.11(1) | 3.07(1) |         | $\text{OSO}^{\text{I}}\text{-OSO}^{\text{II}}/\text{\AA}$ | 4.29(2)         |
| $\text{OCO}^{\text{I}}\text{-OCO}^{\text{II}}/\text{\AA}$ | 5.04(3)         | 2.99(2) | 3.09(1) | 3.09(1) | 2.94(1) |         |                                                           |                 |

## References

- 1 K. M. Broadus and S. R. Kass, *J. Am. Chem. Soc.*, 2000, **122**, 9014-9018.
- 2 G. Kresse and J. Furthmüller, *Phys. Rev. B*, 1996, **54**, 11169-11186.
- 3 P. E. Blöchl, *Phys. Rev. B*, 1994, **50**, 1795317979.
- 4 G. Kresse and D. Joubert. *Phys. Rev. B*, 1999, **59**, 1758-1775.
- 5 J. P. Perdew, K. Burke and M. Ernzerhof, *Phys. Rev. Lett.*, 1996, **77**, 3865-3868.
- 6 J. Klimeš, D. R. Bowler and A. Michaelides, *J. Phys. Cond. Mat.*, 2010, **22**, 022201.
- 7 A. Togo and I. Tanaka, *Scripta Mat.*, 2015, **108**, 1-5.
- 8 A. J. Ramirez-Cuesta, *Comput. Phys. Commun.*, 2004, **157**, 226238.
- 9 C. A. Fernandez, P. K. Thallapally, R. K. Motkuri, S. K. Nune, S. J. C. umrak, J. Tian and J. Liu, *Cryst. Growth Des.*, 2010, **10**, 1037-1039.
- 10 X. L. Cui, Q. W. Yang, L. F. Yang, R. Krishna, Z. G. Zhang, Z. B. Bao, H. Wu, Q. L. Ren, W. Zhou, B. L. Chen and H. B. Xing, *Adv. Mat.*, 2017, **29**, 1606929.
- 11 D. Britt, D. Tranchemontagne and O. M. Yaghi, *Proc. Natl. Acad. Sci. USA*, 2008, **105**, 11623-11627.
- 12 P. K. Thallapally, R. K. Motkuri, C. A. Fernandez, B. P. McGrail and G. S. Behrooz, *Inorg. Chem.*, 2010, **49**, 49094915.
- 13 S. H. Yang, J. L. Sun, A. J. Ramirez-Cuesta, S. K. Callear, W. I. F. David, D. P. Anderson, R. Newby, A. J. Blake, J. E. Parker, C. C. Tang and M. Schröder, *Nat. Chem.*, 2012, **4**, 887894.
- 14 M. Savage, Y. G. Cheng, T. L. Easun, J. E. Eyley, S. P. Argent, M. R. Warren, W. Lewis, C. Murray, C. C. Tang, M. D. Frogley, G. Cinque, J. L. Sun, S. Rudic, R. T. Murder, M. J. Benham, A. N. Fitch, A. J. Blake, A. J. Ramirez-Cuesta, S. H. Yang and M. Schröder, *Adv. Mat.*, 2016, **28**, 8705-8711.
- 15 K. Tan, P. Canepa, Q. H. Gong, J. Liu, D. H. Johnson, A. Dyevoich, P. K. Thallapally, T. Thonhauser, J. Li and Y. J. Chabal, *Chem. Mat.*, 2013, **25**, 4653-4662.
- 16 S. H. Yang, L. F. Liu, J. L. Sun, K. M. Thomas, A. J. Davies, M. W. George, A. J. Blake, A. H. Hill, A. N. Fitch, C. C. Tang and M. Schröder, *J. Am. Chem. Soc.*, 2013, **135**, 4954-4957.
